# Supplementary material for: Riverine particulate C and N generated at the permafrost thaw front: case study of western Siberian rivers across a 1700-km latitudinal transect
Source: Copernicus journal article supplement (doi:10.5194/bg-2018-245), 2018-06-25
Supplement: Supplementary file [file bg-2018-245-AC4-supplement.pdf]

1 Riverine particulate C and N generated at the permafrost thaw front:  
2 case study of western Siberian rivers across a 1700-km latitudinal transect

3  
4 Ivan V. KRICKOV<sup>1</sup>, Artem G. LIM<sup>1</sup>, Rinat M. MANASYPOV<sup>1,2</sup>,  
5 Sergey V. LOIKO<sup>1</sup>, Liudmila S. SHIROKOVA<sup>2,3</sup>, Sergey N. KIRPOTIN<sup>1</sup>,  
6 Jan KARLSSON<sup>4</sup>, Oleg S. POKROVSKY<sup>3\*</sup>

7  
8 <sup>1</sup> *BIO-GEO-CLIM Laboratory, Tomsk State University, Tomsk, Russia*

9 <sup>2</sup> *N. Laverov Federal Center for Integrated Arctic Research, Russian Academy of Sciences,*  
10 *Arkhangelsk, Russia*

11 <sup>3</sup> *Geosciences and Environment Toulouse, UMR 5563 CNRS, 14 Avenue Edouard Belin 31400*  
12 *Toulouse, France*

13 <sup>4</sup> *Climate Impacts Research Centre, Department of Ecology and Environmental Science, Umeå*  
14 *University, 901 87 Umeå, Sweden*

15  
16 *\*Email: oleg.pokrovsky@get.omp.eu*

17 *Key words: nutrient, particulate, suspended, landscape, bog, lake, forest, thaw, Siberia*

18  
19 Submitted to *Biogeosciences*, after revision, August 2018  
20  
21  
22  
23  
24  
25  
26  
27  
28  
29

30 **Abstract**

31 In contrast to numerous studies on the dynamics of dissolved ( $< 0.45 \mu\text{m}$ ) elements in  
32 permafrost-affected high latitude rivers, very little is known of the behavior of river suspended ( $>$   
33  $0.45 \mu\text{m}$ ) matter (RSM) in these regions. In order to test the effect of climate, permafrost and  
34 physio-geographical landscape parameters (bogs, forest and lake coverage of the watershed) on  
35 RSM and particulate C, N and P concentration in river water, we sampled 33 small and medium  
36 size rivers (10 – 100,000  $\text{km}^2$  watershed) along a 1700 km N - S transect including both  
37 permafrost-affected and permafrost-free zones of **the** Western Siberian Lowland (WSL). The  
38 concentration of C and N in RSM decreased with the increase in river watershed size, illustrating  
39 *i*) the importance of organic debris in small rivers which drain peatlands and *ii*) the role of mineral  
40 matter from bank abrasion in larger rivers. The presence of lakes in the watershed increased C and  
41 N but decreased P concentrations in **the** RSM. The C:N ratio in the RSM reflected the source  
42 from deep rather than surface soil horizon, similar to that of other Arctic rivers. This suggests the  
43 export of peat and mineral particles through suprapermafrost flow occurring at the base of the  
44 active layer. There was a maximum of **both** particulate C and N concentration **and export fluxes**  
45 at the beginning of permafrost appearance, **in the** sporadic and discontinuous zone (62-64°N). This  
46 presumably reflected the organic matter mobilization from newly thawed organic horizons in soils  
47 at the active latitudinal thawing front. The results suggest that a northward shift of permafrost  
48 boundaries and an increase in active layer thickness may increase particulate C and N export by  
49 WSL rivers to the Arctic Ocean by a factor of 2, while P export may remain unchanged. In  
50 contrast, within a long-term climate warming scenario, the disappearance of permafrost in the  
51 north, the drainage of lakes and transformation of bogs to forest may decrease C and N  
52 concentration in RSM by 2 to 3 times.

53

54

## 1. Introduction

High-latitude rivers are most vulnerable to on-going climate change via altering their hydrological regime (Bring et al., 2016) and widespread permafrost thaw that stimulates nutrient release (Vonk et al., 2015). For carbon (C), the particulate fraction (POC) contributes substantially to the total organic C export from the continent to the ocean (Schlesinger and Melack, 1981; Lal, 2003; Ludwig and Probst, 1996; Galy et al., 2015; Li et al., 2017; Coppola et al., 2018); a two-fold increase of Arctic rivers POC fluxes by 2100 is predicted (Gordeev and Kravchishina, 2009). Although the reasons for strong variations of POC in freshwaters are not yet fully understood (Tiang et al., 2015; Lee et al., 2015; Yang et al., 2016), the temperature (Hilton, 2016) and runoff (Goni et al., 2015) combined with local storm events (Jeong et al., 2012; Wiegner et al., 2009) are widely recognized as the most important driving factors. This may be especially true for northern aquatic systems, being highly sensitive to flood events, due to shallow water paths and short transit time in watersheds.

Of special interest to POC of the Arctic rivers is that, if soil organic C escapes degradation during river transport and thus buried in marine sediments, it can contribute to a geological carbon dioxide sink (e.g., Hilton et al., 2015). Further, potentially increased transport of P and N may significantly change primary productivity in riverine ecosystems (Wrona et al. 2016; McClelland et al. 2007), thereby impeding rigorous predictions of climate change impact on Arctic terrestrial-aquatic ecosystems.

Despite significant efforts in characterizing the fluxes, chemistry, and origin of particulate organic matter (POM) in large Arctic Rivers (Lobbés et al., 2000; Dittmar and Kattner, 2003; Unger et al., 2005; Guo et al., 2004, Guo and Macdonald, 2006; Gladyshev et al., 2015; Emmerton et al., 2008; McClelland et al., 2016; Gareis and Lesack, 2017), these studies do not allow for assessment of mechanisms of POM generation in the watershed. In particular, the role of size of the river watershed and its landscape (physio-geographical) parameters is still poorly known.

80 Thus, although detailed studies of particulate nutrients in small Arctic rivers helped to constrain  
81 seasonal features of export fluxes (Cai et al., 2008; Dornblaser and Striegl, 2007; Lamoureux and  
82 Lafrenière, 2014; McClelland et al., 2014), the key environmental driving factors of particulate  
83 nutrient concentration and stoichiometry in Arctic rivers—permafrost coverage and lakes and  
84 forest proportion on the watershed—remain poorly resolved.

85 In this regard, large continental plains such as the western Siberia Lowland (WSL), which  
86 contains sizeable reservoirs of frozen and thawed organic carbon, N, P and inorganic nutrients  
87 (Sheng et al. 2004; Stepanova et al., 2015; Raudina et al., 2017), may be especially useful in  
88 assessing environmental control on particulate nutrient transport to the Arctic Ocean. A vast  
89 amount of frozen peat in this region can strongly affect the coastal Arctic system in the event of  
90 permafrost thaw and enhanced RSM export from the watersheds. Due to the high homogeneity of  
91 the WSL landscape, lithology, and topography, one can use the natural north-south gradient of the  
92 permafrost zone distribution to assess the direct impact of permafrost conditions on river water  
93 chemistry.

94 Detailed studies of the dissolved fraction of WSL river waters demonstrated several typical  
95 features occurring over a sizeable gradient of climate and permafrost. In pioneering works of Frey  
96 and co-workers it was shown that southern permafrost-free regions export 3 to 4 times greater  
97 amounts of dissolved C, N and P (Frey and Smith, 2005; Frey et al., 2007a, b; Frey and  
98 McClelland, 2009) and that wetlands exert a significant positive effect on carbon and nutrient  
99 concentration in small rivers (Frey et al., 2007a; Frey and McClelland, 2009). Although the  
100 majority of these features were confirmed by a more recent study of dissolved carbon and nutrients  
101 in WSL rivers over main hydrological seasons (Pokrovsky et al., 2015 and Vorobyev et al., 2017,  
102 respectively), an assessment of particulate load transport in WSL rivers has not yet been performed  
103 and the mechanisms controlling particulate C, N and P mobilization from WSL soils to the Arctic  
104 Ocean remain unknown.

105 To improve current understanding of magnitude and seasonality of riverine particulate  
106 nutrient export, we quantified concentrations of C and macro- (N, P) nutrients across a vast  
107 latitudinal gradient (1700 km) with special emphasis **on the** permafrost-bearing zone during three  
108 main hydrological regimes: 1) the peak of spring flood (early June 2016), 2) the summer base flow  
109 (August 2016), and 3) the autumn high flow before the ice (October 2016). We aimed at  
110 **characterizing** the effect of latitude, permafrost coverage and fundamental landscape features  
111 (proportion of bogs, lakes and forest in the watershed) as well as the size of the river itself on  
112 particulate C, N and P concentration and the relative fraction of particulate versus total (particulate  
113 + dissolved) nutrient transport. We further used acquired knowledge to infer the basic mechanisms  
114 of particulate nutrient mobilization from soils to rivers and applied these mechanisms **to predict**  
115 **change in** particulate nutrient concentration under climate warming, landscape evolution and  
116 progressive permafrost thaw in the largest frozen peatland province in the world.

117

## 118 **2. Study Site and Methods**

119 The rivers were sampled in the Western Siberia Lowland (WSL), a huge (> 2 million km<sup>2</sup>),  
120 peatland and forest zone situated in the taiga forest, forest-tundra and tundra zone. The position  
121 of biomes follows the decrease of mean annual air temperature (MAAT) from -0.5°C in the south  
122 to -9.5°C in the north. The permafrost distribution also follows the latitudinal gradient of MAAT  
123 and changes from absent, isolated and sporadic in the south to discontinuous and continuous in  
124 the north. Further details of WSL physio-geographical settings, peat and lithological description  
125 of the territory are provided elsewhere (Kremenetski et al., 2003; Stepanova et al., 2015;  
126 Pokrovsky et al., 2015; Raudina et al., 2017). For each biome (taiga, forest-tundra and tundra)  
127 several rivers with different watershed sizes were chosen and **the** sampling **campaign** was  
128 performed along a latitudinal transect following previous strategies for **WSL river dissolved load**  
129 (Pokrovsky et al., 2015, 2016; Vorobyev et al., 2017).

130           Altogether, we sampled 33 rivers that belong to watersheds of Ob, Pur and Taz including  
131 these large rivers as well (**Fig. 1**). The landscape parameters of sampled catchments were  
132 determined by digitizing available soil, vegetation, lithological and geocryological maps (**Table**  
133 **S1** and Vorobyev et al., 2017). There was no covariation between river size and other landscape  
134 parameters including permafrost coverage. Sampling was performed during three main  
135 hydrological seasons: 1) spring flood (17 May – 15 June 2016), 2) summer baseflow (1 – 29  
136 August 2016), and 3) autumn baseflow before ice (24 September – 13 October 2016). Note that  
137 the most interesting period—in terms of soil connection to the rivers—occurred in late autumn  
138 when the active layer depth was at its maximum. This period has not been covered in previous  
139 studies of dissolved WSL river load. The reason of sampling both summer and autumn period is  
140 to test the role of connectivity between soil fluids and the rivers. In fact, the main factor controlling  
141 elemental behavior during accelerating permafrost thaw and release of dissolved and particulate  
142 C and nutrients to surrounding aquatic landscapes is the connectivity between soils and rivers or  
143 lakes, which occurs via water and solute transport along the permafrost table (“supra-permafrost  
144 flow”). The supra-permafrost (shallow subsurface) water occurs in the active layer, typically at  
145 the border between the thawed and frozen part of the soil profile (Woo, 2012). In the frozen  
146 peatbogs of WSL, the active (unfrozen) layer thickens (ALT) is maximal at the end of unfrozen  
147 season, which is typically end of September - beginning of October (Raudina et al., 2018).

148           The sampling strategy consisted of moving from south to north in spring and autumn over  
149 a 2-3 week period, following the natural change of seasons. This allowed us to sample all rivers  
150 of the transect at approximately the same time after ice off and before ice on. The year 2016 was  
151 normal for western Siberia in terms of spring, summer and autumn precipitation but the  
152 temperature was 4 and 2.7 °C higher than normal spring and summer, respectively, and not  
153 different from the average T in autumn (Rosgidromet, 2017). For assessing inter-annual variations  
154 in RSM concentrations, we analyzed the RSM samples collected in WSL rivers across the same

155 transect during a previous campaign in the spring of 2014 and 2015 and the summer and autumn  
156 of 2014 and 2015.

157 Large water samples were collected from the middle of the river at 0.5 m depth in pre-  
158 cleaned polypropylene jars (30 to 50 L) and were allowed to decantate over 2-3 days. The water  
159 of the bottom layer of the barrels (approx. 30% of the initial volume) was centrifuged on-site for  
160 20 min at 3500 rpm using 50-mL Nalgene tubes; sediment was frozen at -18°C and freeze-dried  
161 later in the laboratory. In addition to decantation and centrifugation, RSM was collected via direct  
162 filtration of large volumes (20 to 30 L) of river water with an Inox (AISI 304) Teflon® PTFE-  
163 coated filtration unit (Fisher Bioblock) equipped with 142 mm acetate cellulose Sartorius  
164 membranes (0.45 µm) and operated at 5-7 bars. An average flow rate of 1-2 L h<sup>-1</sup> was created by  
165 a peristaltic pump (MasterFlex B/T) with Teflon tubing. For determination of total concentration  
166 of suspended material, smaller volumes of freshly collected river water (1-2 L) were filtered on-  
167 site (at the river bank or in the boat) with pre-weighted acetate cellulose filters (47 mm, 0.45 µm)  
168 and Nalgene 250-mL polystyrene filtration units using a Mityvac® manual vacuum pump.

169 There was reasonably good agreement, typically within 10%, between the concentration  
170 of RSM collected in large barrels via decantation followed by centrifugation, a direct high-  
171 pressure filtration using 142-mm membranes and vacuum filtration using Nalgene 250-mL unit.  
172 The agreement was better than ±10% for large rivers in summer and autumn when the mineral  
173 component dominated the RSM. The difference between two methods was between 10 and 20%  
174 for small organic-rich rivers containing peat and plant debris especially in spring.

175 The C and N concentration in RSM collected from large-volume separation procedure was  
176 measured using catalytic combustion with Cu-O at 900°C with an uncertainty of ≤ 0.5% using  
177 Thermo Flash 2000 CN Analyzer at Tomsk University. The samples were analyzed before and  
178 after 1:1 HCl treatment to distinguish between total and inorganic C; however the ratio of C<sub>organic</sub>  
179 : C<sub>carbonate</sub> in RSM was always above 20 and the contribution of carbonate C to total C in the RSM

180 was equal in average  $0.3 \pm 0.3\%$  (2 s.d.,  $n = 30$ ). In addition to RSM, we compared total and HCl-  
181 treated C analysis in peat soil column (organic part and 3 separate mineral horizons) sampled from  
182 the middle part of river transect. The  $C_{\text{carbonate}}$  share was below 2 % of total C content for both the  
183 mineral and organic part of soil columns. The analyses we performed could not distinguish mineral  
184 N linked to clays ( $\text{NH}_4^+$  cation) and organic N in the RSM. For P, the RSM samples were subjected  
185 to full acid leaching in a clean room following ICP-MS (Agilent 7500 ce) analyses using methods  
186 for  $C_{\text{org}}$ -rich natural samples described by Stepanova et al. (2015). Water samples for DOC and  
187 total dissolved phosphorus ( $P_{\text{tot}}$ ) were filtered on-site through  $0.45 \mu\text{m}$  acetate cellulose filters  
188 (Millipore, Sartorius) and analyzed following methods previously described by Pokrovsky et al.  
189 (2015, 2016).

190 A regression analysis was used to quantify the relationship between C, N and P  
191 concentration in RSM and the % of permafrost, wetlands, lake and forest coverage of the  
192 watershed as well as the surface area of the watershed ( $S_{\text{watershed}}$ ). In order to assess a general  
193 impact of the permafrost on RSM nutrient concentration we separated all sampled rivers into five  
194 categories according to the permafrost distribution on their watersheds: 1) permafrost-free (south  
195 of  $61^\circ\text{N}$ ), 2) isolated ( $61$  to  $63.5^\circ\text{N}$ ); 3) sporadic ( $63.5$  to  $65^\circ\text{N}$ ); 4) discontinuous ( $65$  to  $66^\circ\text{N}$ ),  
196 and 5) continuous permafrost zones (north of  $66^\circ\text{N}$ ). The non-parametric statistics were used  
197 because, based on Shapiro-Wilk test of the normality of variables, the data on C, N, P  
198 concentration in RSM and the % of element in suspended form were not normally distributed. For  
199 these reasons, we used the median, 1<sup>st</sup> and 3<sup>rd</sup> quartiles to trace dependence of nutrient  
200 concentration to the type of permafrost distribution. The differences in suspended C, N and P  
201 concentration between different seasons and between each two adjacent permafrost zones were  
202 tested using a Mann-Whitney U test for a paired data set with significance level at 0.05. For  
203 unpaired data, a non-parametric H-criterion Kruskal-Wallis test was performed for all watershed  
204 sizes and all permafrost zones.



### 205 3. Results

#### 206 3.1. C, N and P concentrations in RSM and their link to seasons and watershed size

207 Mean bulk RSM concentration in the WSL river waters did not depend on the **season of**  
208 **open-water period of the year** and was equal to  $7.1\pm 3.9$ ,  $8.1\pm 4.1$ , and  $7.0\pm 3.7$  mg/L in spring,  
209 summer and autumn, respectively (**Table 1**). The RSM concentrations weakly depended on the  
210 size of the watersheds ( $S_{\text{watershed}}$ ) with a negative relationship in autumn ( $R^2 = 0.33$ ,  $p < 0.05$ , Fig.  
211 **S1 A**). Further, the RSM concentration increased with permafrost coverage and latitude ( $R^2 = 0.56$   
212 and 0.41), although this was visible only in autumn (**Fig. S1 B, C, Table S2**). The sporadic  
213 permafrost zone exhibited the highest RSM concentration in summer (**Fig. S1 D**). Finally, there  
214 was no correlation ( $p > 0.05$ ) between lake, bog or forest coverage and the RSM concentration  
215 ( $R^2 < 0.2$ , see also **Table S2**). For RSM concentration, statistically significant difference between  
216 different permafrost zones, notably between permafrost-free and permafrost-bearing regions, were  
217 evidenced in summer and autumn using Kruskal-Wallis and Mann-Whitney tests (**Table S3**).

218 The concentrations of C, N and P in WSL rivers averaged over 3 seasons were equal to  
219  $15.3\pm 9.7\%$ ,  $1.2\pm 0.9\%$ , and  $0.49\pm 0.42\%$  in mass of RSM ( $1.05\pm 0.805$ ,  $0.083\pm 0.066$ , and  
220  $0.035\pm 0.036$  mg L<sup>-1</sup> in the riverwater). The watershed size sizably affected the C concentration:  
221 there was a power-law decrease of C with the size of watershed ( $R^2 = 0.28$ , 0.47, and 0.25 in  
222 spring, summer and autumn, respectively **Fig. 2A**) but there was no relationship with the N and P  
223 concentrations in RSM ( $R^2 < 0.2$ , **Fig. 2 B, C**). Generally, a 2 to 3-fold **decrease** in  $C_{\text{org}}$ , from ca.  
224 20-30% in rivers with  $S_{\text{watershed}} < 100$  km<sup>2</sup> to  $C_{\text{org}} = 5-10\%$  in rivers with  $S_{\text{watershed}} > 10,000$  km<sup>2</sup>  
225 was observed. The C:N ratio of RSM was independent on the watershed size in spring but  
226 decreased 2-3 times with  $S_{\text{watershed}}$  increase ( $R^2 = 0.4$ ) in summer and autumn (**Fig. 2D**).

227 The inter-annual variations of suspended nutrient concentration in WSL rivers were of  
228 secondary order importance when compared to season and watershed size control. We did not find  
229 any inter-annual differences (at  $p < 0.05$ ) in RSM concentration and P concentration in RSM

230 collected in June and August in 2014, 2015, and 2016 for the same 8 rivers (Agan, Trom'egan,  
231 Pyakopur, Aivasedapur, Purpe, Yamsovery, Pur and Taz, **Table S1**)

232

### 233 *3.2. Role of permafrost distribution and landscape parameters for C, N, and P* 234 *concentration and fraction of particulate nutrients*

235 There was a local maximum of C and N concentration in isolated and sporadic permafrost  
236 zone (**Fig. 3 A, B, D, E**), which was not seen for P (**Fig. 4 C, F**). Overall, the differences in C and  
237 N concentrations in RSM among different permafrost zones were significant as verified by the  
238 non-parametric Kruskal-Wallis H-test ( $0.005 < p < 0.05$ ), while the difference in P concentration  
239 between permafrost zones was not significant ( $p > 0.05$ , see **Table S3 C, D**). Specifically, the C  
240 demonstrated a maximum concentration (significant at  $p < 0.02$  during all three seasons) at 62-  
241 64°N (**Fig. S2 A**). The latitude generally did not impact N and P concentration in RSM (**Fig. S2**  
242 **B, C**). **Significant** differences between adjacent permafrost zones were evidenced by C and N in  
243 summer and autumn (**Table S3 D**).

244 The landscape parameters **of** the watershed (bogs, lakes and forest coverage) sizably  
245 affected ( $p < 0.05$ ) suspended C and N. Bogs and lakes **in** the watershed increased the  
246 concentration of C and N in RSM whereas forest generally decreased C in RSM (**Fig. 4 A-B-C**  
247 **for C, and Fig. S3 A-B-C for N**). This increase in C and N % with bogs and lakes coverage and  
248 a decrease with forest presence was mostly visible in summer and autumn. The increase in lake  
249 coverage of the watershed led to a decrease in P concentration in RSM in summer and autumn ( $R^2$   
250 = 0.31 and 0.22, respectively, **Fig. S3 D-E-F**) that was especially visible in autumn in the  
251 permafrost-free zone ( $R = -0.88$ , **Table S2**). During this period, the P concentration in RSM  
252 positively correlated with the presence of forest in the permafrost zone ( $R = 0.60$ , **Table S2**).

253 The Mann Whitney U-test for the impact of watershed parameters demonstrated significant  
254 differences in C and N concentration (all seasons) and P concentration (summer baseflow)

255 between watersheds having < 10% and > 10% lake coverage, **Table S3-E**. The differences were  
256 also observed among watershed with < 50% and > 50% of bogs for C (all seasons) and N (summer  
257 and autumn), **Table S3-F**. Finally, the forest coverage (< 30% and > 30%) exhibited significant  
258 effect on C and N (all seasons) and P (autumn baseflow), **Table S3-G**.

259 The share of particulate carbon versus total (dissolved + particulate C) did not demonstrate  
260 any significant dependence on  $S_{\text{watershed}}$ , bogs, forest and permafrost proportions on the watershed  
261 ( $R^2 < 0.3$ , not shown). However, there was a localized maximum of particulate carbon fraction  
262 around 64°N within the isolated to sporadic permafrost zone (**Fig. 5 A and C**). The presence of  
263 lakes sizably increased the particulate over total transport of C in rivers ( $R^2 = 0.52$  and 0.32 in  
264 spring and summer, respectively, **Fig. 5 B**). The share of particulate phosphorus versus total  
265 ranged from 10 to 90%. It did not demonstrate any link to size of river watershed, % of forest and  
266 bogs, and type of permafrost distribution (not shown).

267

### 268 *3.3.C, N, P and RSM export fluxes by WSL rivers*

269 Based on available hydrological data, we calculated open water-period fluxes of C, N and  
270 P in WSL rivers. This analysis takes into account the spatial and temporal variability of river  
271 discharge, performed using hydrological approaches elaborated for the dissolved (< 0.45  $\mu\text{m}$ )  
272 fraction of the river water (Pokrovsky et al., 2015, 2016). The seasonal fluxes of C, N, P and RSM  
273 export by WSL rivers were calculated separately for spring (May and June), summer (July, August  
274 and September) and autumn period (September-October) for each 2° - wide latitudinal belt of the  
275 full WSL territory, following the approach developed for dissolved C and major and trace  
276 elements in the river water (**Fig. S4**). These 3 seasons of open-water period represent by far the  
277 largest contribution to overall annual element and RSM yield, following the results for other Arctic  
278 rivers (McClelland et al., 2016). Thus, 6 ice-covered months (November to April) represent only  
279 12% of annual POC export flux by the Ob River. Based on results of 3 main seasons, an open-

280 water period export fluxes of C, N, P and RSM were calculated (**Fig. 6**). There is a clear maximum  
281 of C and N export fluxes at the beginning of permafrost appearance, in isolated to sporadic  
282 permafrost zone. The obtained particulate C and N yields are comparable with other Siberian  
283 rivers. For two largest WSL rivers, Pur and Taz, we found May to October export fluxes of 69 and  
284 80 kg C km<sup>2</sup> y<sup>-1</sup> which is lower than the annual POC yield of the Ob River (191 kg C km<sup>-2</sup> y<sup>-1</sup>) but  
285 similar to that of the Yenisey River (103 kg C km<sup>-2</sup> y<sup>-1</sup>), McClelland et al. (2016).

286

## 287 4. Discussion

### 288 4.1. Concentrations of C, N and P in the RSM and impact of the watershed size

289 The RSM values in WSL rivers (2 to 18 mg/L) are similar to other boreal rivers of low  
290 runoff which drain peatlands such as Severnaya Dvina (2.3 to 16 mg/L; Pokrovsky et al., 2010)  
291 but lower than the Ob River itself (around 30 mg/L; Gebhardt et al., 2004) and other big rivers of  
292 the Kara Sea basin (average 22 mg/L; Gordeev et al., 1996). The POC values of the WSL rivers  
293 (0.5 to 3.0 mg/L POC) are consistent with recent data on WSL river transects sampled in 2015  
294 (Vorobyev et al., 2017) and are in agreement with those of the Ob-Taz River confluence measured  
295 in June (1.3 mg/L; Gebhardt et al., 2004), the Ob River at Salekhard in May through October (0.8  
296 to 2.4 mg POC/L; Le Fouest et al., 2013), the low reaches of the Ob River (1.2 to 2.4 mg POC/L;  
297 McClelland et al., 2016), the mean multi-annual values of POC in subarctic rivers of Northern  
298 Eurasia draining peatlands (3.2, 0.3, 0.9 mg POC/L for S. Dvina, Pechora and Ob as compiled in  
299 Gordeev et al., 1996) and the Lena River basin (0.5 mg/L; Kutscher et al., 2015).

300 However, the C<sub>org</sub> concentrations in RSM of WSL rivers (5 to 40%), notably in small and  
301 medium size (< 10,000-100,000 km<sup>2</sup>) ones, are an order of magnitude higher than those in other  
302 world rivers which drain mineral substrates (typically 1% C<sub>org</sub> in RSM; Meybeck, 1993) and  
303 significantly higher than the values of the Siberian rivers (2.3, 3.6, 5.8, 3.0% for Ob, Yenisey,  
304 Lena and Kolyma, respectively; Gordeev and Kravchishina, 2009). For example, typical  
305 concentration of C<sub>org</sub> in RSM of large (S<sub>watershed</sub> > 100,000 km<sup>2</sup>) Central Siberian rivers that drain

306 larch forest is only 0.4 to 0.5 % (Pokrovsky et al., 2005). The  $C_{org}$  concentration in the RSM of  
307 Severnaya Dvina River (which has sizeable proportion of bogs and lakes within its watershed  
308 compared to WSL rivers) is  $2.7 \pm 0.7\%$  in May and  $4.8 \pm 1.1\%$  in August (Savenko et al., 2004). The  
309  $N_{org}$  content in RSM ranges from 0.3 to 1.8 % (0.05 to 0.2 mg particulate  $N_{tot}/L$ ) which is much  
310 higher than that in sedimentary rocks (0.05 to 0.06 %; Houlton et al., 2018) but is comparable with  
311 the value reported for the freshwater part of Ob river estuary (0.16 mg N/L; Gebhardt et al., 2004),  
312 the Ob River at Salekhard in May to October (0.1 to 0.3 mg PON/L; Le Fouest et al., 2013), the  
313 Yukon River ( $0.14 \pm 0.09$  mg particulate N/L; Guo and MacDonald, 2006), and small rivers of the  
314 North slope of Alaska (0.05 to 0.6 mg PON/L; McClelland et al., 2014).

315 High concentrations of C (and N) in the RSM of WSL rivers may stem from the organic  
316 nature of soils that prevail on river watersheds. The Histosols, one of the dominant soil groups of  
317 WSL, are capable of providing a sizeable amount of organic particles given the higher  
318 susceptibility of peat to physical disintegration compared to mineral soils. The enrichment of the  
319 river water in C-rich particles may occur at both the river bank (especially in small rivers flowing  
320 through the wetlands) and within the extensive floodplains via remobilization of organic-rich  
321 sediments during high flow periods.

322 The concentration of C and N in RSM decreased with increase in  $S_{watershed}$ , thereby  
323 illustrating the importance of organic particles in small rivers draining peatlands and the role of  
324 mineral matter from bank abrasion in larger rivers. The impact of watershed size is more  
325 significant for C than for N. Presumably this is because N is more affected by autochthonous  
326 processes and that particulate N may partly be generated from phytoplankton and macrophytes in  
327 the river. Small rivers ( $S_{watershed} < 100-1000$  km<sup>2</sup>) exhibited the largest scatter in particulate C, N  
328 (and P) concentrations. This is probably due to multiple sources of POM and the very short transit  
329 time in the watershed that results in fast responses of river particulate load to minor variations in  
330 surface hydrology including high sensitivity to local storm events.

331 The decrease of C:N in the RSM from small to large rivers likely reflected a shift in main  
332 origin of suspended matter, from peat in small rivers to more lithogenic (deep soil) in large rivers.  
333 This was mostly visible in summer and autumn; in spring the rivers exhibited a very homogeneous  
334 C:N signature which may be linked to a dominant source of RSM from bank abrasion and sediment  
335 transport as well as deposition within the riparian zone. In fact, the flood plain of the Ob river and  
336 other rivers of the WSL extend more than 10 times the width of the main channel (Vorobyev et  
337 al., 2015). Note that the C:N ratio in large rivers (>100,000 km<sup>2</sup>) approaches that of average  
338 sedimentary rocks (8.1; Houlton et al., 2018). In this regard, highly homogeneous C:N ratios in  
339 particulate load of Arctic rivers (7 to 18 for Mackenzie, Yukon, Kolyma, Lena, Yenisey and Ob  
340 regardless of season; McClelland et al., 2016) are interpreted as the mixture of deep soil sources  
341 where C:N < 10 (Schädel et al., 2014) and upper organic-rich horizons of soils with elevated C:N  
342 (Gentsch et al., 2015). The Ob River demonstrates the youngest POC of all Arctic Rivers (-203  
343 to -220 ‰  $\Delta^{14}\text{C}$ ; McClelland et al., 2016) which certainly indicates a relatively fresh (ca. 1,000-  
344 2,000 years old) origin of particulate carbon that is presumably from intermediate peat horizons.

345 We believe that variations in C:N in RSM reflect different sources of organic material  
346 feeding the river depending on seasons and latitudes. A compilation of C:N ratios in peat and  
347 mineral horizons as well as in thermokarst lake sediments for four main sites of latitudinal transect  
348 considered in this study is given in Fig. S5 of Supplement. The range of C:N values in RSM  
349 rivers (10 to 20) is closer to that in sediments of thermokarst lakes (20 to 30). Note that the  
350 resuspension of sediments may be an important source of water column POC (Yang et al., 2016).  
351 The minerotrophic bogs, which are mostly linked to rivers via hydrological networks, have a C:N  
352 ratio in upper peat horizons ranging from 24 to 28. In mineral soils of the region, the C:N range is  
353 between 10 and 15 regardless of latitude, from the tundra situated Taz River riparian zone to the  
354 taiga situated middle channel of the Ob River. For upper organic horizons the C:N is always higher  
355 than the bottom mineral horizons. The old alluvial deposits of the Pyakopur River (discontinuous

356 permafrost zone) had only 0.2% of POC with C:N equal to 6. Overall, there is an enrichment in N  
357 relative to C in the course of water transport of organic and organo-mineral solid particles from  
358 soils and riparian deposits to the river water.

359

360

#### 361 *4.2. A maximum of C and N in the isolated/sporadic permafrost zone and the impact of* 362 *river watershed characteristics*

363 Complementary to previous results on dissolved (< 0.45 µm) C and N concentrations in WSL  
364 rivers acquired by Frey et al. (2007a) and Vorobyev et al. (2017) that demonstrated weak or no impact  
365 of permafrost on DOC and DON, the particulate C and N were affected by the presence of permafrost  
366 in summer and autumn but not affected by its presence in spring. Moreover, during freshet the  
367 permafrost distribution did not influence the bulk RSM concentration in WSL rivers. This strongly  
368 implies that the delivery of RSM in rivers, and its chemical composition, are tightly linked to the  
369 thickness of the active layer and limited by transport of soil particles over the suprapermafrost flow  
370 to the river channel. This thickness is highest in September at the end of the active season. In  
371 agreement with this, the C and N demonstrated a maximum concentration and export fluxes at 62-  
372 64°N, in the sporadic to isolated permafrost zone and was most visible during summer and autumn  
373 (Fig. 3 A, B and 6 A, B). This latitudinal belt can be considered as a large-scale thawing front for  
374 the frozen peat which corresponds to the southern boundary of permafrost persistence. It is  
375 important to note that that WSL rivers exhibit maximum CO<sub>2</sub> emission fluxes at the sporadic to  
376 isolated permafrost belt (Serikova et al., 2018), which could be linked to strong processing of POC  
377 and PON in the water column of WSL rivers. Interestingly, that rate of POC biodegradation,  
378 leading to potential CO<sub>2</sub> emissions, sizably exceeds that of DOC in boreal humic waters  
379 (Attermeyer et al., 2018). Furthermore, a maximum percentage of particulate C over total C  
380 (suspended + dissolved) was also in the isolated and sporadic permafrost zones in spring; this

381 maximum shifted to the sporadic permafrost zone in summer and moved northward to the  
382 discontinuous permafrost zone in autumn (**Fig. 5 C**). We believe that this corresponds to a  
383 progressive increase in the thickness of the active layer which controls the degree of peat and  
384 mineral particles leaching from the soil profile to the river. The thickness of this layer increases  
385 from spring to autumn and more importantly it moves northward during this period (Trofimova  
386 and Balybina, 2014). Enhanced mobilization of nutrients at the “hot spot” of permafrost thaw in  
387 frozen peat landscapes was recently demonstrated on a local scale in western Siberia (Loiko et al.,  
388 2017).

389         The impact of watershed characteristics on particulate C and N was clearly pronounced  
390 with increased C and N concentration in RSM where there were increased bog and lake  
391 proportions and decreased C and N concentration where there was increasing forest coverage. The  
392 stronger impact of lakes compared to bogs on C concentration in RSM suggests that the generation  
393 of C-rich particles occurs more efficiently in large water bodies than in stagnant shallow water  
394 bodies. Several mechanisms are likely to operate in this regard. First, photodegradation of DOM  
395 in large and shallow lakes of WSL is expected to be quite strong similar to shallow Canadian thaw  
396 ponds (Laurion and Mladenov, 2013). Additionally, given the very short transit time of water from  
397 the surrounding peat to the lakes via suprapermfrost flow (Ala-aho et al., 2018a, b; Raudina et  
398 al., 2018), the allochthonous chromophoric DOM-rich material that arrives to the lakes is  
399 subjected to fast degradation and coagulation such as that shown in Scandinavian lakes  
400 (Kortelainen et al., 2006b; von Wachenfeldt and Tranvik, 2008). Second, the peat abrasion at the  
401 border of the thermokarst lakes and thaw ponds, which are highly abundant in the territory  
402 (Polishchuk et al., 2017, 2018), occurs due to wave erosion and thermo-abrasion (Shirokova et al.,  
403 2013; Manasypov et al., 2015). Physical disintegration of peat at the lake coast likely generates a  
404 large amount of suspended organic-rich material that can be exported to hydrological networks  
405 during, for example, lake drainage or through already existing connecting channels (Kirpotin et



406 al., 2008, 2011). Note that the maximal lake coverage of the WSL territory is in the 63°N to 64°N  
407 latitudinal belt (Polishchuk et al., 2017) where maximum C and N concentration and RSM export  
408 fluxes also occur. Because the majority of thermokarst lakes are isolated water bodies without  
409 inlet and outlet, this connectivity is achieved via water movement along the permafrost table in  
410 the thawed active layer (Raudina et al., 2018) in the form of so-called suprapermafrost flow  
411 between peat bogs, lakes, and rivers.

412 Finally, for particulate P, neither its concentration nor the particulate fraction were affected  
413 by permafrost distribution, probably due to the various processes of biological uptake and mineral  
414 precipitation controlling P removal both in soil profile and in the river water. For example, lakes  
415 and bogs retained particulate P, similar to that of dissolved P, which is in agreement with global  
416 assessments (Bouwman et al., 2013), P behavior in European northern wetlands and lakes (Lidman  
417 et al., 2014), and recent results on dissolved P in the WSL rivers (Vorobyev et al., 2017).

418

#### 419 *4.3. Mechanisms of RSM generation and prospective for climate warming in western Siberia*

420 A framework of particulate C, N and P generation in WSL rivers across the permafrost  
421 gradient is shown in **Fig. 7**. We suggest that the concentration **and export fluxes** of suspended  
422 particles depends on both the supply and losses in the catchments. The sources of suspended  
423 particles in WSL rivers include: (i) vegetation litter which is washed by surficial flow to the river,  
424 especially in spring; (ii) surface (peat) soil horizons, which are also most active in spring,  
425 especially in the north; (iii) deep peat and mineral horizons which provide the particles via bank  
426 abrasion in spring and via suprapermafrost flow in summer and autumn, (iv) lake **and pond**  
427 sediments formed either by flocculation of DOM via photo- and bio-degradation processes or via  
428 lake coastal abrasion due to wave erosion, and finally, (v) autochthonous organic debris of  
429 macrophytes, periphyton and phytoplankton, whose contribution is maximal in summer and  
430 autumn. A non-steady-state physical erosion of peat soils in WSL provides maximum particulate

431 nutrients within the most fragile zone of actively thawing permafrost between 62 and 64°N of the  
432 sporadic to isolated permafrost zone. The maximal thickness of the active layer progressively  
433 moves north during the active season thereby leading to maximal export of particulate C, N, and  
434 P at the thawing front. However, we also suggest that part of the differences in mobilized  
435 particulates is masked by retention in recipient waters. The transit time of water and particles in the  
436 southern WSL rivers is much longer than that in northern rivers (Ala-aho et al., 2018a, b) hence the  
437 biological uptake mechanisms together with physio-chemical processes such as photo-degradation  
438 of POC (Mayer et al., 2006; Riggsbee et al., 2008) or cryocoagulation (Pokrovsky et al., 2018) have  
439 sufficient time to act on suspended matter of soil and shallow subsurface waters and to remove the  
440 nutrients from the river water as well. In rivers of the continuous permafrost zone, a relatively small  
441 stock of nutrient-rich particles within the soil profile and on soil surface (as plant litter) is largely  
442 compensated for by a more rapid flushing and shorter travel time through soils and rivers and also  
443 lower microbial and phytoplankton activity. As a result, the zone of sporadic to isolated permafrost  
444 exhibits both maximal release of soil particles and minimal uptake by in-stream processes. Further to  
445 the north, shallow unfrozen peat depth and low biomass cannot supply sufficiently high suspended  
446 nutrients and the particulate transport of C and N decreases. In contrast, for P, opposite gradients in  
447 supply versus in stream removal may cancel out the net effect of temperature and permafrost on  
448 suspended P in the river water.

449         Based on these results we can speculate on the conditions following warming and  
450 permafrost thaw. On a short-term prospective (10-50 years), assuming a soil temperature rise of  
451 0.15 to 0.3 degree per 10 years in WSL (Pavlov et al., 2009; Anisimov et al., 2012), the northern  
452 part of the WSL (discontinuous and continuous permafrost zones) will transform into sporadic  
453 and isolated permafrost zones (Anisimov and Reneva, 2006). This will lead to increase in C and  
454 N concentrations in RSM, C and N particulate export yield of the watershed, and overall increase  
455 in particulate versus dissolved transport of C and P. Given the contemporary maximum of C and

456 N at the permafrost thawing front, this increase may be two-fold. However, on a longer prospective  
457 (50-100 years), even the continuous permafrost zone may disappear (Romanovsky et al., 2008;  
458 Nadyozhina et al., 2008) and this will decrease the particulate C and N concentration in the  
459 northern rivers and, consequently, their export to the coastal zone of the Kara Sea. Judging from  
460 the actual difference in nutrient concentrations and fluxes among adjusting permafrost zones, this  
461 decrease may be around a factor of 2 to 3. Furthermore, on the same long-term prospective, the  
462 drainage of lakes and disappearance of bogs due to colonization of northern tundra by forests  
463 (Anisimov et al., 2011; Anisimov and Sherstiukov, 2016; Kirpotin et al., 2008, 2009, 2011) should  
464 lead to a further decrease in particulate nutrient load of WSL rivers.

465

#### 466 **Conclusions:**

467 Relatively low bulk RSM concentration in WSL rivers stems from low runoff in this flat  
468 peatland province of boreal and subarctic zone. High concentrations of C and N in the RSM of  
469 WSL rivers reflect the essentially organic nature of soils across the WSL. At the isolated/sporadic  
470 permafrost zone, we observed a maximum concentration of C and N in the RSM, maximal fraction  
471 of particulate OC relative to total (dissolved + particulate), and maximal export fluxes. This  
472 suggests the enhanced generation of C, N-rich RSM at the thawing front of permafrost, where  
473 thickness of the active layer is maximal. The C and N concentrations in particulate load of WSL  
474 rivers decrease with forest coverage of the watershed and increase with the proportion of lakes  
475 and bogs; however, the bulk concentration of RSM did not depend on landscape parameters of  
476 the watersheds. This implies generation of C, N-rich particles via coastal peat abrasion, sediment  
477 resuspension, and photo- and bio-coagulation of DOM in lentic surface waters which are  
478 hydrologically connected to rivers. To model a northward permafrost boundary and forest line  
479 shifting with increase in air and soil temperature we used a substituting space for time scenario of  
480 climate warming in the WSL that was well developed for the dissolved fraction of C and nutrients.

481 From a short-term climate warming prospective, the effect of a northward shift of permafrost  
482 boundary may produce about a two-fold increase in particulate C and N concentration and **export**  
483 **fluxes** in rivers of the discontinuous and continuous permafrost zones, and thus may enhance the  
484 **delivery** of these nutrients by the most northern WSL rivers to the Arctic Ocean. On a long-term  
485 prospective, the disappearance of permafrost in the northern part of WSL will decrease the  
486 concentrations **and export** of these nutrients to their current level. The P is unlikely to be  
487 significantly affected by permafrost change. Moreover, within a long-term climate warming  
488 scenario, the drainage of lakes and transformation of bogs to forest may decrease nutrient  
489 concentration in RSM and corresponding export flux to the Arctic Ocean.

490

#### 491 **Acknowledgements:**

492 This work was supported by RSCF No 18-17-00237 “Mechanisms of hydrochemical runoff of the  
493 Ob river...” (analyses, modeling); RFBR project № 18-35-00563\18 , Ministry of Education and  
494 Science of the Russian Federation № 6.7515.2017/9.1, and by VR (the Swedish Research  
495 Council) grant no. 325-2014-6898.

496

#### 497 **References**

498

- 499 Ala-aho, P., Soulsby, C., Pokrovsky, O.S., Kirpotin, S.N., Karlsson, J., Serikova, S., Manasypov,  
500 R.M., Krickov, I., Lim, A., and Tetzlaff D.: Permafrost and lakes control river isotope  
501 composition across a boreal-arctic transect in the western Siberia lowland, *Environ. Res.*  
502 *Lett.*, 13 (3), 034028, <https://doi.org/10.1088/1748-9326/aaa4fe>, 2018a.
- 503 Ala-Aho, P., Soulsby, C., Pokrovsky, O.S., Kirpotin, S.N., Karlsson, J., Serikova, S., Vorobyev,  
504 S.N., Manasypov, R.M., Loiko, S., and Tetzlaff D.: Using stable isotopes to assess surface  
505 water source dynamics and hydrological connectivity in a high-latitude wetland and  
506 permafrost influenced landscape, *J. Hydrol.*, 556, 279–293,  
507 <https://doi.org/10.1016/j.jhydrol.2017.11.024>, 2018b.
- 508 Anisimov, O. A., Anokhin, A., Lavrov, S. A., Malkova, G. V., Pavlov A.V., Romanovskiy, V.E.,  
509 Streletskiy, D. A., Kholodov, A.,L., and Shiklomanov, N. I.: Continental multiyear  
510 permafrost // *Methods of study the sequences of climate changes for nature systems*. Ed. S.M.  
511 Semenov. Moscow: VNIIGMI, 2012. P. 268–328. (In Russian)
- 512 Anisimov, O.A., and Sherstiukov, A.B.: Evaluating the effect of climatic and environmental  
513 factors on permafrost in Russia, *Earth`s Cryosphere*, XX (№ 2), 78–86, 2016.
- 514 Anisimov, O.A., Zhiltsova, E.L., and Reneva, S.A.: Estimation of critical levels of climate change

515 impact on natural land ecosystems of Russian territory, *Meteorology and Hydrology*, 11,  
516 723-730, <https://doi.org/10.3103/S1068373911110033>, 2011.

517 Anisimov, O., and Reneva, S.: Permafrost and Changing Climate: The Russian Perspective,  
518 *AMBIO*, 35(4), 169–175, <https://doi.org/10.1579/0044-7447>, 2006.

519 Attermeyer, K., Catalán, N., Einarsdottir, K., Freixa, A., Groeneveld, M., Hawkes, J. A., et al.:  
520 Organic carbon processing during transport through boreal inland waters: Particles as  
521 important sites. *J. Geophys. Research: Biogeosciences*, Art No123, <https://doi.org/10.1029/2018JG004500>, 2018.

522

523 Battin, T. J., Kaplan, L. A., Findlay, S., Hopkinson, C. S., Marti, E., Packman A. I., Newbold, J.  
524 D., and Sabater, F.: Biophysical controls on organic carbon fluxes in fluvial networks, *Nat.*  
525 *Geosci.*, 1, 95–100, <https://doi.org/10.1038/ngeo602>, 2008.

526 Blois, J. L., Williams, J. W., Fitzpatrick, M. C., Jackson, S. T., and Ferrier, S.: Space can substitute  
527 for time in predicting climate-change effects on biodiversity, *PNAS*, 110 (23), 9374-9379,  
528 <https://doi.org/10.1073/pnas.1220228110>, 2013.

529 Bring, A., Fedorova, I., Dibike, Y., Hinzman, L., Mård, J., Mernild, S. H., Prowse, T., Semenova,  
530 O., Stuefer, S. L., and Woo, M.-K.: Arctic terrestrial hydrology: A synthesis of processes,  
531 regional effects, and research challenges, *J. Geophys. Res.-Biogeo.*, 121(3), 621–649,  
532 <https://doi.org/10.1002/2015JG003131>, 2016.

533 Bouwman, A. F., Bierkens, M. F. P., Griffioen, J., Hefting, M. M., Middelburg, J. J., Middelkoop,  
534 H., and Slomp, C. P.: Nutrient dynamics, transfer and retention along the aquatic continuum  
535 from land to ocean: towards integration of ecological and biogeochemical models,  
536 *Biogeosciences* 10, 1-23, <https://doi.org/10.5194/bg-10-1-2013>, 2013.

537 Cai, Y., L. Guo, T. A. Douglas, and T. E. Whitley: Seasonal variations in nutrient concentrations  
538 and speciation in the Chena River, Alaska, *J. Geophys. Res.-Biogeo.*, 113, G03035,  
539 <https://doi.org/10.1029/2008JG000733>, 2008.

540 Cole, J. J., Prairie, Y. T., Caraco, N. F., McDowell, W. H., Tranvik, L. J., Striegl, R. G., Duarte, C.  
541 M., Kortelainen, J. P., Downing, A., Middelburg, J. J., Melack, J.: Plumbing the Global Carbon  
542 Cycle: Integrating Inland Waters into the Terrestrial Carbon Budget, *Ecosystems*, 10(1), 172–  
543 185, <https://doi.org/10.1007/s10021-006-9013-8>, 2007.

544 Coppola, A.I.; Wiedemeier, D.B.; Galy, V.; Haghipour, N.; Hanke, U.M.; Nascimento, G.S.; et al.:  
545 Global-scale evidence for the refractory nature of riverine black carbon. *Nature Geosciences*,  
546 11, 584-588, 2018.

547 Dittmar, Th., and Kattner, G.: The biogeochemistry of the river and shelf ecosystem of the Arctic  
548 Ocean: a review, *Mar. Chem.*, 83, 103-120, [https://doi.org/10.1016/S0304-4203\(03\)00105-1](https://doi.org/10.1016/S0304-4203(03)00105-1),  
549 2003.

550 Dornblaser, M. M., and R. G. Striegl: Nutrient (N, P) loads and yields at multiple scales and subbasin  
551 types in the Yukon River basin, Alaska, *J. Geophys. Res.-Biogeo.*, 112, G04S57,  
552 <https://doi.org/10.1029/2006JG000366>, 2007.

553 Emmerton, C. A., Lesack, L. F. W., and Vincent, W. F.: Mackenzie River nutrient delivery to the  
554 Arctic Ocean and effects of the Mackenzie Delta during open water conditions, *Global*  
555 *Biogeochem. Cy.*, 22, GB1024, <https://doi.org/10.1029/2006GB002856>, 2008.

556 Frey, K. E., McClelland, J. W., Holmes, R. M., and Smith, L. C.: Impacts of climate warming and  
557 permafrost thaw on the riverine transport of nitrogen and phosphorus to the Kara Sea, *J.*  
558 *Geophys. Res.-Biogeo.*, 112, G04S58, doi:10.1029/2006JG000369, 2007a.

559 Frey, K. E., Siegel, D. I., and Smith, L.C.: Geochemistry of west Siberian streams and their potential  
560 response to permafrost degradation, *Water Resour. Res.*, 43(3), W03406,  
561 <https://doi.org/10.1029/2006WR004902>, 2007b.

562 Frey, K. E., and Smith, L.C.: Amplified carbon release from vast West Siberian peatlands by 2100,  
563 *Geophys. Res. Lett.*, 32, L09401, <https://doi.org/10.1029/2004GL022025>, 2005.

564 Frey, K. E., and McClelland, J. W.: Impacts of permafrost degradation on arctic river

565 biogeochemistry, *Hydrol. Process.*, 23(1), 169–182, <https://doi.org/10.1002/hyp.7196>, 2009.

566 Galy, V., Peucker-Ehrenbrink, B. and Eglinton, T.: Global carbon export from the terrestrial  
567 biosphere controlled by erosion, *Nature*, 521, 204–207, <http://dx.doi.org/10.1038/nature14400>,  
568 2015.

569 Gareis, J. A. L., and Lesack, L. F. W.: Fluxes of particulates and nutrients during hydrologically  
570 defined seasonal periods in an ice-affected great Arctic river, the Mackenzie, *Water Resour.*  
571 *Res.*, 53(7), 6109–6132, <https://doi.org/10.1002/2017WR020623>, 2017.

572 Gebhardt, A. C., Gaye-Haake, C., Unger, D., Lahajnar, N., and Ittekkot V.: Recent particulate organic  
573 carbon and total suspended matter fluxes from the Ob and Yenisei Rivers into the Kara Sea  
574 (Siberia), *Mar. Geol.*, 207, 225–245, <https://doi.org/10.1016/j.margeo.2004.03.010>, 2004.

575 Gentsch, N., Mikutta, R., Alves, R. J. E., Barta, J., Čapek, P., Gittel, A., Hugelius, G., Kuhry, P.,  
576 Lashchinskiy, N., Palmtag, J., Richter, A., Šantručková, H., Schneckner, J., Shibistova, O., Ulrich,  
577 T., Wild, B., and Guggenberger, G.: Storage and transformation of organic matter fractions in  
578 cryoturbated permafrost soils across the Siberian Arctic, *Biogeosciences*, 12(14), 4525-4542,  
579 <http://dx.doi.org/10.5194/bg-12-4525-2015>, 2015.

580 Gladyshev, M. I., Kolmakova, O. V., Tolomeev, A. P., Anishchenko, O. V., Makhutova, O. N.,  
581 Kolmakova, A. A., Kravchuk, E. S., Glushchenko, L. A., Kolmakov, V. I., and Sushchik, N.N.:  
582 Differences in organic matter and bacterioplankton between sections of the largest Arctic river:  
583 Mosaic or continuum?, *Limnol. Oceanogr.*, 60, 1314-1331, <https://doi.org/10.1002/lno.10097>,  
584 2015.

585 Goñi, M. A., Hatten, J. A., Wheatcroft, R. A., and Borgeld, J. C.: Particulate organic matter export by  
586 two contrasting small mountainous rivers from the Pacific Northwest, U.S.A., *J. Geophys. Res.-*  
587 *Biogeo.*, 118, 1–23, <https://doi.org/10.1002/jgrg.20024>, 2013.

588 Gordeev, V. V., Martin, J. M., Sidorov, I. S., and Sidorova, M. V.: A reassessment of the Eurasian  
589 river input of water, sediment, major elements, and nutrients to the Arctic Ocean, *Am. J. Sci.*,  
590 296(6), 664–691, 1996.

591 Gordeev, V. V., and Kravchishina, M. D.: River flux of dissolved organic carbon (DOC) and  
592 particulate organic carbon (POC) to the Arctic Ocean: what are the consequences of the  
593 global changes?, in: *Influence of Climate Change on Changing Arctic and Sub-Arctic*  
594 *Conditions*, Springer, 145-160, 2009.

595 Grosse, G., Goetz, S., McGuire, D., Romanovsky, V.E., and Schuur E. A. G.: Changing permafrost  
596 in a warming world and feedbacks to the Earth system, *Environ. Res. Lett.*, 11, 040201,  
597 <https://doi.org/10.1088/1748-9326/11/4/040201>, 2016.

598 Guo, L., and Macdonald, R. W.: Source and transport of terrigenous organic matter in the upper  
599 Yukon River: Evidence from isotope (d13C, D14C, and d15N) composition of dissolved,  
600 colloidal, and particulate phases, *Global Biogeochem. Cy.*, 20, GB2011,  
601 <https://doi.org/10.1029/2005GB002593>, 2006.

602 Guo, L., Zhang, J.-Z., and Guéguen, C.: Speciation and fluxes of nutrients (N, P, Si) from the upper  
603 Yukon River, *Global Biogeochem. Cy.*, 18, GB1038, <https://doi.org/10.1029/2003GB002152>,  
604 2004.

605 Hilton, R. G., Galy, V., Gaillardet, J., Dellinger, M., Bryant, C., O'Regan, M., Gröcke, D.R., Coxall,  
606 H., Bouchez, J., and Calmels, D.: Erosion of organic carbon in the Arctic as a geological carbon  
607 dioxide sink, *Nature*, 524, 84-87, <https://doi.org/10.1038/nature14653>, 2015.

608 Hilton, R.G.: Climate regulates the erosional carbon export from the terrestrial biosphere,  
609 *Geomorphology*, 277, 118-132, <https://doi.org/10.1016/j.geomorph.2016.03.028>, 2017.

610 Holmes, R. M., Peterson, B. J., Gordeev, V. V., Zhulidov, A. V., Meybeck, M., Lammers, R. B., and  
611 Vorosmarty, C. J.: Flux of nutrients from Russian rivers to the Arctic Ocean: Can we establish  
612 a baseline against which to judge future changes?, *Water Resour. Res.*, 36(8), 2309–2320,  
613 <https://doi.org/10.1029/2000WR900099>, 2000.

- 614 Jeong, J. J., Bartsch, S., Fleckenstein, J. H., Matzner, E., Tenhunen, J. D., Lee, S. D., Park, S. K.,  
615 and Park, J.-H.: Differential storm responses of dissolved and particulate organic carbon in a  
616 mountainous headwater stream, investigated by high-frequency, in situ optical measurements,  
617 *J. Geophys. Res.-Biogeo.*, 117(3), 1–13, <https://doi.org/10.1029/2012JG001999>, 2012.
- 618 Kirpotin, S., Polishchuk, Y., Zakharova, E., Shirokova, L., Pokrovsky, O., Kolmakova, M., and  
619 Dupre, B.: One of possible mechanisms of thermokarst lakes drainage in West-Siberian North,  
620 *Int. J. Environ. Stud.*, 65(5), 631–635, <https://doi:10.1080/00207230802525208>, 2008.
- 621 Kirpotin, S. N., Berezin A., Bazanov V. et al.: Western Siberia wetlands as indicator and regulator of  
622 climate change on the global scale, *Internat. J. Environ. Stud.*, 66(4), 409–421, DOI:  
623 [10.1080/00207230902753056](https://doi.org/10.1080/00207230902753056), 2009.
- 624 Kirpotin, S., Polishchuk, Y., Bryksina, N., Sugaipova, A., Kouraev, A., Zakharova, E., Pokrovsky,  
625 O.S., Shirokova, L., Kolmakova, M., Manassypov, R., and Dupre B.: West Siberian palsa  
626 peatlands: distribution, typology, hydrology, cyclic development, present-day climate-driven  
627 changes and impact on CO<sub>2</sub> cycle, *Int. J. Environ. Stud.*, 68(5), 603–623,  
628 <https://doi:10.1080/00207233.2011.593901>, 2011.
- 629 Kortelainen, P., Mattsson, T., Finér, L., Ahtiainen, M., Saukkonen, S., and Sallantausta, T.: Controls  
630 on the export of C, N, P and Fe from undisturbed boreal catchments, Finland, *Aquat. Sci.*, 68(4),  
631 453–468, <https://doi.org/10.1007/s00027-006-0833-6>, 2006a.
- 632 Kortelainen, P., Rantakari, M., Huttunen, J. T., Mattsson, T., Alm, J., Juutinen, S., Larmola, T.,  
633 Silvola, J., and Martikainen, P. J.: Sediment respiration and lake trophic state are important  
634 predictors of large CO<sub>2</sub> evasion from small boreal lakes, *Glob. Change Biol.*, 12, 1554–1567,  
635 <https://doi.org/10.1111/j.1365-2486.2006.01167.x>, 2006b.
- 636 Kremenetski, K. V., Velichko, A. A., Borisova, O. K., MacDonald, G. M., Smith, L. C., Frey, K. E.,  
637 and Orlova, L. A.: Peatlands of the West Siberian Lowlands: Current knowledge on zonation,  
638 carbon content, and Late Quaternary history, *Quaternary Sci. Rev.*, 22, 703–723,  
639 [https://doi.org/10.1016/S0277-3791\(02\)00196-8](https://doi.org/10.1016/S0277-3791(02)00196-8), 2003.
- 640 Kutscher, L., Mörth, C.-M., Porcelli, D., Hirst, C., Maximov, T. C., Petrov, R. E., and Andersson, P.  
641 S.: Spatial variation in concentration and sources of organic carbon in the Lena River, Siberia,  
642 *J. Geophys. Res.-Biogeo.*, 122, 1999–2016, <https://doi.org/10.1002/2017JG003858>, 2017.
- 643 Lal, R.: Soil erosion and the global carbon budget, *Environ. Int.*, 29, 437–450,  
644 [http://dx.doi.org/10.1016/S0160-4120\(02\)00192-7](http://dx.doi.org/10.1016/S0160-4120(02)00192-7), 2003.
- 645 Lamoureux, S. F., and Lafrenière, M. J.: Seasonal fluxes and age of particulate organic carbon  
646 exported from Arctic catchments impacted by localized permafrost slope disturbances, *Environ.*  
647 *Res. Lett.*, 9, 045002, <https://doi:10.1088/1748-9326/9/4/045002>, 2014.
- 648 Laurion, I., and Mladenov, N.: Dissolved organic matter photolysis in Canadian Arctic thaw ponds,  
649 *Environ. Res. Lett.*, 8, 035026, <https://doi:10.1088/1748-9326/8/3/035026>, 2013.
- 650 Lee, M. H., Payeur-Poirier, J. L., Park, J. H., and Matzner, E.: Variability in runoff fluxes of dissolved  
651 and particulate carbon and nitrogen from two watersheds of different tree species during intense  
652 storm events, *Biogeosciences*, 13(18), 5421–5432, <https://doi.org/10.5194/bg-13-5421-2016>,  
653 2016.
- 654 Le Fouest, V., Babin, M., and Tremblay, J.-É.: The fate of riverine nutrients on Arctic shelves,  
655 *Biogeosciences*, 10, 3661–3677, <https://doi:10.5194/bg-10-3661-2013>, 2013.
- 656 Leonov, A. B., and Chicherina, O. V.: Export of biogenic components of the riverine flux to the  
657 White Sea, *Water Resour.*, 31(2), 170–192, 2004.
- 658 Li, M., Peng, C., Wang, M., Xue, W., Zhang, K., Wang, K., Shi G., and Zhu, Q.: The carbon flux of  
659 global rivers: A re-evaluation of amount and spatial patterns, *Ecol. Indic.*, 80, 40–51,  
660 <https://doi.org/10.1016/j.ecolind.2017.04.049>, 2017.
- 661 Lidman, F., Kohler, S. J., Morth, C.-M., and Laudon, H.: Metal transport in the boreal landscape –  
662 the role of wetlands and the affinity for organic matter, *Environ. Sci. Technol.*, 48, 3783–3790,  
663 <https://doi:10.1021/es4045506>, 2014.

664 Lobbes, J. M., Fitznar, H. P., and Kattner, G.: Biogeochemical characteristics of dissolved and  
665 particulate organic matter in Russian rivers entering the Arctic Ocean, *Geochim. Cosmochim.*  
666 *Ac.*, 64, 2973–2983, [https://doi.org/10.1016/S0016-7037\(00\)00409-9](https://doi.org/10.1016/S0016-7037(00)00409-9), 2000.

667 Loiko, S. V., Pokrovsky, O. S., Raudina, T., Lim, A., Kolesnichenko, L. G., Shirokova, L. S.,  
668 Vorobyev, S. N., and Kirpotin, S. N.: Abrupt permafrost collapse enhances organic carbon, CO<sub>2</sub>,  
669 nutrient, and metal release into surface waters, *Chem. Geol.*, 471, 153–165,  
670 <https://doi.org/10.1016/j.chemgeo.2017.10.002>, 2017.

671 Ludwig, W., and Probst, J. L.: Predicting the oceanic input of organic carbon by continental erosion,  
672 *Global Biogeochemical Cy.*, 10(1), 23–41, <https://doi.org/10.1029/95GB02925>, 1996.

673 Manasypov, R. M., Vorobyev, S. N., Loiko, S. V., Kritzkov, I. V., Shirokova, L. S., Shevchenko, V.  
674 P., Kirpotin, S. N., Kulizhsky, S. P., Kolesnichenko, L. G., Zemtsov, V. A., Sinkinov, V. V.,  
675 and Pokrovsky, O. S.: Seasonal dynamics of organic carbon and metals in thermokarst lakes  
676 from the discontinuous permafrost zone of western Siberia, *Biogeosciences*, 12, 3009–3028,  
677 <https://doi.org/10.5194/bg-12-3009-2015>, 2015.

678 Mayer, L. M., Schick, L. L., Skoroko, K., and Boss, E.: Photodissolution of particulate organic matter  
679 from sediments, *Limnol. Oceanogr.*, 51(2), 1064–1071,  
680 <https://doi.org/10.4319/lo.2006.51.2.1064>, 2006.

681 McClelland, J. W., Stieglitz, M., Pan, F., Holmes, R. M., and Peterson, B. J.: Recent changes in nitrate  
682 and dissolved organic carbon export from the upper Kuparuk River, North Slope, Alaska, *J.*  
683 *Geophys. Res.-Biogeo.*, 112, G04S60, <http://doi.wiley.com/10.1029/2006JG000371>, 2007.

684 McClelland, J. W., Townsend-Small, A., Holmes, R. M., Pan, F., Stieglitz, M., Khosh, M., and  
685 Peterson B. J.: River export of nutrients and organic matter from the North Slope of Alaska to  
686 the Beaufort Sea, *Water Resour. Res.*, 50(2), 1823–1839,  
687 <https://doi.org/10.1002/2013WR014722>, 2014.

688 McClelland, J. W., Holmes, R. M., Raymond, P. A., Striegl, R. G., Zhulidov, A. V., Zimov, S. A.,  
689 Zimov, N., Tank, S. E., Spencer, R. G. M., Staples, R., Gurtovaya, T. Y., and Grif, C. G.:  
690 Particulate organic carbon and nitrogen export from major Arctic rivers, *Global Biogeochem.*  
691 *Cy.*, 30, 629–643, <https://doi.org/10.1002/2015GB005351>, 2016.

692 Meybeck, M.: C, N, P and S in rivers: from sources to global inputs, in: Wollast, R., Mackenzie, F.,  
693 and Chou, L., editors, *Interaction of C, N, P, and S biogeochemical cycles and global change*,  
694 *NATO ASI Series: Berlin, Heidelberg, Springer-Verlag*, 163–193, 1993.

695 Nadyozhina, E. D., Shkolnik, I. M., Pavlova, T. V., Molkentin, E. K., and Semioshina, A. A.:  
696 Permafrost response to the climate warming as simulated by the regional climate model of  
697 the main geophysical observatory, *Kriosfera Zemli*, XII(3), 3–11, 2008. (In Russian)

698 Pavlov, A. V., and Malkova, G. V.: Mapping of trends of the contemporary ground temperature  
699 changes in the Russian north, *Kriosfera Zemli*, XIII(4), 32–39, 2009. (In Russian)

700 **Pokrovsky, O. S., Karlsson, J., Giesler, R.: Freeze-thaw cycles of Arctic thaw ponds remove colloidal**  
701 **metals and generate low-molecular weight organic matter, *Biogeochemistry*, 137(3), 321–336,**  
702 **2018.**

703 Pokrovsky, O. S., Manasypov, R. M., Shirokova, L. S., Loiko, S. V., Krickov, I. V., Kopysov S. G.,  
704 Zemtsov, V. A., Kulizhsky, S. P., Vorobyev, S. N., and Kirpotin, S. N.: Permafrost coverage,  
705 watershed area and season control of dissolved carbon and major elements in western Siberia  
706 rivers, *Biogeosciences*, 12, 6301–6320, <https://doi.org/10.5194/bg-12-6301-2015>, 2015.

707 Pokrovsky, O. S., Manasypov, R. M., Loiko, S. V., Krickov, I. A., Kopysov, S. G., Kolesnichenko,  
708 L. G., Vorobyev, S. N., and Kirpotin, S. N.: Trace element transport in western Siberia rivers  
709 across a permafrost gradient, *Biogeosciences*, 13, 1877–1900, <https://doi.org/10.5194/bg-12-17857-2015>, 2016.

711 Pokrovsky, O. S., Schott, J., Kudryavtzev, D. I., and Dupre, B.: Basalts weathering in Central Siberia  
712 under permafrost conditions, *Geochim. Cosmochim. Ac.*, 69, 5659–5680,  
713 <https://doi.org/10.1016/j.gca.2005.07.018>, 2005.



- 714 Pokrovsky, O. S., Viers, J., Shirokova, L. S., Shevchenko, V. P., Filipov, A. S., and Dupré B.:  
715 Dissolved, suspended, and colloidal fluxes of organic carbon, major and trace elements in  
716 Severnaya Dvina River and its tributary, *Chem. Geol.*, 273, 136–149,  
717 <https://doi.org/10.1016/j.chemgeo.2010.02.018>, 2010.
- 718 Polishchuk, Y. M., Bogdanov, A. N., Polischuk, V. Y., Manasypov, R. M., Shiorkova, L. S., Kirpotin,  
719 S. N., and Pokrovsky, O. S.: Size-distribution, surface coverage, water, carbon and metal storage  
720 of thermokarst lakes (> 0.5 ha) in permafrost zone of the Western Siberia Lowland, *Water*, 9  
721 (3), 228, <https://doi.org/10.3390/w9030228>, 2017.
- 722 Polishchuk, Y. M., Bogdanov, A. N., Muratov, I. N., Polishchuk, V. Y., Lim, A., Manasypov, R. M.,  
723 Shirokova, L. S., and Pokrovsky, O. S.: Minor contribution of small thaw ponds to the pools of  
724 carbon and methane in the inland waters of the permafrost-affected part of western Siberian  
725 Lowland, *Environ. Res. Lett.*, 13(4), 045002, <https://doi.org/10.1088/1748-9326/aab046>, 2018.
- 726 Raudina, T. V., Loiko, S. V., Lim, A. G., Krickov, I. V., Shirokova, L. S., Istignichev, G. I., Kuzmina,  
727 D. M., Kulizhsky, S. P., Vorobyev, S. N., and Pokrovsky, O. S.: Dissolved organic carbon and  
728 major and trace elements in peat porewater of sporadic, discontinuous, and continuous  
729 permafrost zones of western Siberia, *Biogeosciences*, 14, 3561–3584,  
730 <https://doi.org/10.5194/bg-14-3561-2017>, 2017.
- 731 Raudina, T.V., Loiko, S. V., Lim, A., Manasypov, R. M., Shirokova, L. S., Istigechev, G. I.,  
732 Kuzmina, D. M., Kulizhsky, S. P., Vorobyev, S. N., and Pokrovsky, O. S.: Permafrost thaw and  
733 climate warming may decrease the CO<sub>2</sub>, carbon, and metal concentration in peat soil waters of  
734 the Western Siberia Lowland, *Sci. Total. Environ.*, 634, 1004–1023,  
735 <https://doi.org/10.1016/j.scitotenv.2018.04.059>, 2018.
- 736 Richardson, D. C., Newbold, J. D., Aufdenkampe, A. K., Taylor, P. G., and Kaplan, L. A.: Measuring  
737 heterotrophic respiration rates of suspended particulate organic carbon from stream ecosystems,  
738 *Limnol. Oceanogr.-Meth.*, 11(5), 247–261, <https://doi.org/10.4319/lom.2013.11.247>, 2013.
- 739 Riggsbee, J., Orr, C., Leech, D., Doyle, M., and Wetzel, R.: Suspended sediments in river ecosystems:  
740 photochemical sources of dissolved organic carbon, dissolved organic nitrogen, and adsorptive  
741 removal of dissolved iron, *J. Geophys. Res. Biogeosci.*, 113, G03019,  
742 <https://doi.org/10.1029/2007JG000654>, 2008.
- 743 Romanovsky, V. E., Kholodov, A. L., Marchenko, S. S., Oberman, N. G., Drozdov, D. S., Malkova,  
744 G. V., Moskalenko, N. G., Vasiliev, A. A., Sergeev, D. O., Zheleznyak, M. N.: Thermal State  
745 and Fate of Permafrost in Russia: First Results of IPY, in: *Proceedings of the 9th International  
746 Conference on Permafrost*, University of Alaska, Fairbanks, June 29 – July 3, 2008 / Kane  
747 D.L., Hinkel K.M. (eds.). vol. 2, 1511–1518.
- 748 Rosgidromet, R. F.: *Doklad ob osobennostyakh klimata na territorii Rossiyskoy Federatsii za 2016  
749 god*, M.: Federal'naya sluzhba po gidrometeorologii i monitoringu okruzhayushchey sredy,  
750 Rosgidromet, Moscow, 2017. (In Russian)
- 751 Savenko, V. S., Pokrovskii, O. S., Dupre, B., Baturin, G. N.: *Dokl. Akad. Nauk* 398, 97–101, 2004  
752 [*Dokl. Earth Sci.* 398, 938, 2004].
- 753 Serikova, S., Pokrovsky, O. S., Ala-Aho, P., Kazantsev, V., Kirpotin, S., Kopysov, S., Krickov, I.,  
754 Laudon, H., Manasypov, R., Shirokova, L.S., Soulsby, C., Tetzlaff, D., Karlsson, J.: High  
755 riverine CO<sub>2</sub> emissions at the permafrost boundary of Western Siberia. *Nature Geoscience*, in  
756 press, 2018.
- 757 Sheng, Y., Smith, L. C., MacDonald, G. M., Kremenetski, K. V., Frey, K. E., Velichko, A. A., Lee,  
758 M., Beilman, D. W., and Dubinin, P.: A high-resolution GIS-based inventory of the west  
759 Siberian peat carbon pool, *Global Biogeochem. Cy.*, 18, GB3004,  
760 <https://doi.org/10.1029/2003GB002190>, 2004.
- 761 Schlesinger, W. H., and Melack, J. M.: Transport of organic carbon in the world's rivers, *Tellus*, 33,  
762 172–187, <https://doi.org/10.3402/tellusa.v33i2.10706>, 1981.

763 Schädel, C., Schuur, E. A. G., Bracho, R., Elberling, B., Knoblauch, C., Lee, H., Luo, Y., Shaver, G.  
764 R., and Turetsky, M. R.: Circumpolar assessment of permafrost C quality and its vulnerability  
765 over time using long-term incubation data, *Global Change Biol.*, 20, 641-652,  
766 <https://doi.org/10.1111/gcb.12417>, 2014.

767 Shirokova, L. S., Pokrovsky, O. S., Kirpotin, S. N., Desmukh, C., Pokrovsky, B. G., Audry, S., Viers,  
768 J.: Biogeochemistry of organic carbon, CO<sub>2</sub>, CH<sub>4</sub>, and trace elements in thermokarst water  
769 bodies in discontinuous permafrost zones of Western Siberia, *Biogeochemistry*, 113, 573–593,  
770 <https://doi.org/10.1007/s10533-012-9790-4>, 2013.

771 Stepanova, V. M., Pokrovsky, O. S., Viers, J., Mironycheva-Tokareva, N. P., Kosykh, N. P., and  
772 Vishnyakova, E. K.: Elemental composition of peat profiles in western Siberia: Effect of the  
773 micro-landscape, latitude position and permafrost coverage, *Appl. Geochem.*, 53, 53–70,  
774 <https://doi.org/10.1016/j.apgeochem.2014.12.004>, 2015.

775 Tian, H., Yang, Q., Najjar, R., Ren, W., Friedrichs, M. A. M., Hopkinson, C. S., and Pan, S.:  
776 Anthropogenic and climatic influences on carbon fluxes from Eastern North America to the  
777 Atlantic ocean: a process-based modeling study, *J. Geophys. Res.-Biogeo.*, 752-772,  
778 <http://dx.doi.org/10.1002/2014JG002760>, 2015.

779 Trofimova, I. E., and Balybina, A. S.: Classification of climates and climatic regionalization of the  
780 West-Siberian plain, *Geography and Natural Resources*, 35(2), 114–122,  
781 <https://doi.org/10.1134/S1875372814020024>, 2014.

782 Vonk, J. E., Tank, S. E., Bowden, W. B., Laurion, I., Vincent, W. F., Alekseychik, P., Amyot, M.,  
783 Billet, M. F., Canário, J., Cory R. M., Deshpande, B. N., Helbig, M., Jammet, M., Karlsson, J.,  
784 Larouche, J., MacMillan, G., Rautio, M., Walter Anthony, K. M., and Wickland, K. P.: Reviews  
785 and syntheses: Effects of permafrost thaw on Arctic aquatic ecosystems, *Biogeosciences*,  
786 12(23), 7129–7167, <https://doi.org/10.5194/bg-12-7129-2015>, 2015.

787 von Wachenfeldt, E., and Tranvik, L. J.: Sedimentation in boreal lakes - The role of flocculation of  
788 allochthonous dissolved organic matter in the water column, *Ecosystems*, 11(5), 803–814,  
789 <https://doi.org/10.1007/s10021-008-9162-z>, 2008.

790 Vorobyev, S. N., Pokrovsky, O. S., Serikova, S., Manasyrov, R. M., Krickov, I. V., Shirokova, L.  
791 S., Lim, A., Kolesnichenko, L. G., Kirpotin, S. N., and Karlsson, J.: Permafrost boundary shift  
792 in western Siberia may not modify dissolved nutrient concentrations in rivers, *Water*, 9, 985,  
793 <https://doi.org/10.3390/w9120985>, 2017.

794 Wiegner, T. N., Tubal, R. L., and MacKenzie, R. A.: Bioavailability and export of dissolved organic  
795 matter from a tropical river during base- and stormflow conditions, *Limnol. Oceanogr.*, 54(4),  
796 1233–1242, <https://doi.org/10.4319/lo.2009.54.4.1233>, 2009.

797 **Woo, M.-K.: Permafrost Hydrology, Springer, Heidelberg Dordrecht London New York, doi**  
798 **[10.1007/978-3-642-23462-0](https://doi.org/10.1007/978-3-642-23462-0), 2012.**

799 Wrona, F. J., Johansson M., Culp J. M., Jenkins A., Mård J., Myers-Smith, I. H., Prowse, T. D.,  
800 Vincent, W. F., and Wookey, P. A.: Transitions in Arctic ecosystems: Ecological implications  
801 of a changing hydrological regime, *J. Geophys. Res.-Biogeo.*, 121(3), 650–674,  
802 <https://doi.org/10.1002/2015JG003133>, 2016.

803 Unger, D., Gaye-Haake, B., Neumann, K., Gebhardt, A. C., and Ittekkot, V.: Biogeochemistry of  
804 suspended and sedimentary material in the Ob and Yenisei rivers and Kara Sea: amino acids  
805 and amino sugars, *Cont. Shelf. Res.*, 25(4), 437-460, <https://doi.org/10.1016/j.csr.2004.09.014>,  
806 2005.

807 Yang, Q., Zhang, X., Xu, X., Asrar, G. R., Smith, R. A., Shih, J. S., and Duan, S.: Spatial patterns  
808 and environmental controls of particulate organic carbon in surface waters in the conterminous  
809 United States, *Sci. Total. Environ.*, 554–555, 266–275,  
810 <https://doi.org/10.1016/j.scitotenv.2016.02.164>, 2016.

811  
812

813  
814

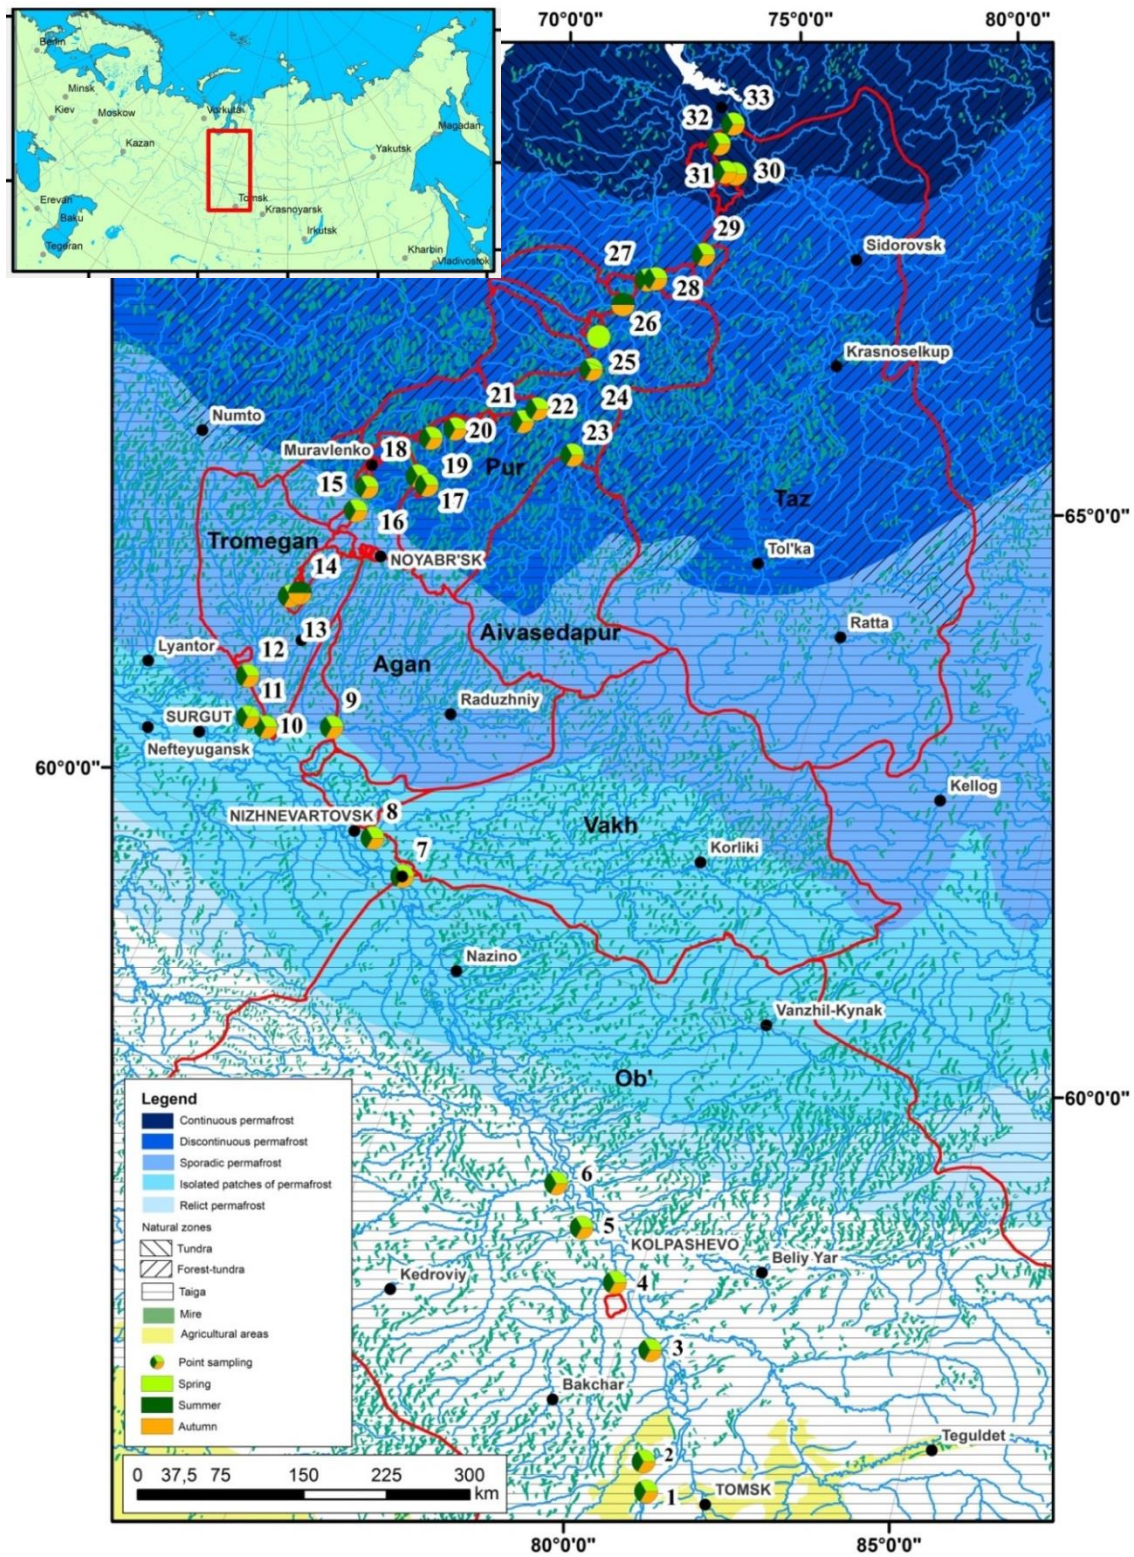

815

816 **Fig. 1.** Sampling sites and physio-geographical context of WSL territory investigated in this  
817 work. The sampling numbers are explained in Table S1.

818  
819  
820

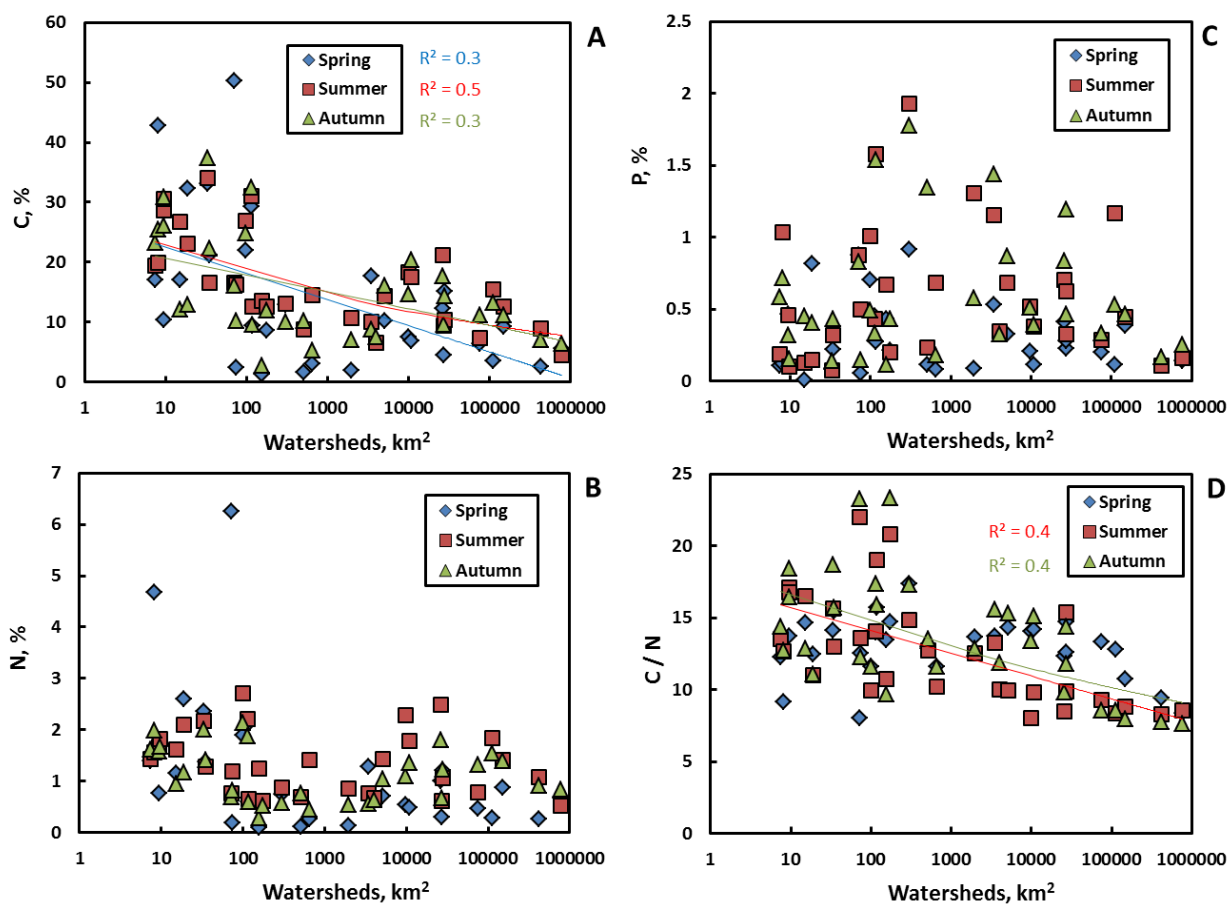

821  
822  
823  
824  
825  
826  
827  
828  
829  
830

**Fig. 2.** Particulate ( $> 0.45 \mu\text{m}$ ) C (A), N (B), P (C) concentration in the RMS (%) and C: N ratio (D) in RSM as a function of river watershed size. The solid lines represent a power law fitting of the data with regression coefficients shown for each season in corresponding panels. Only the curves with  $R^2 > 0.3$  are depicted.

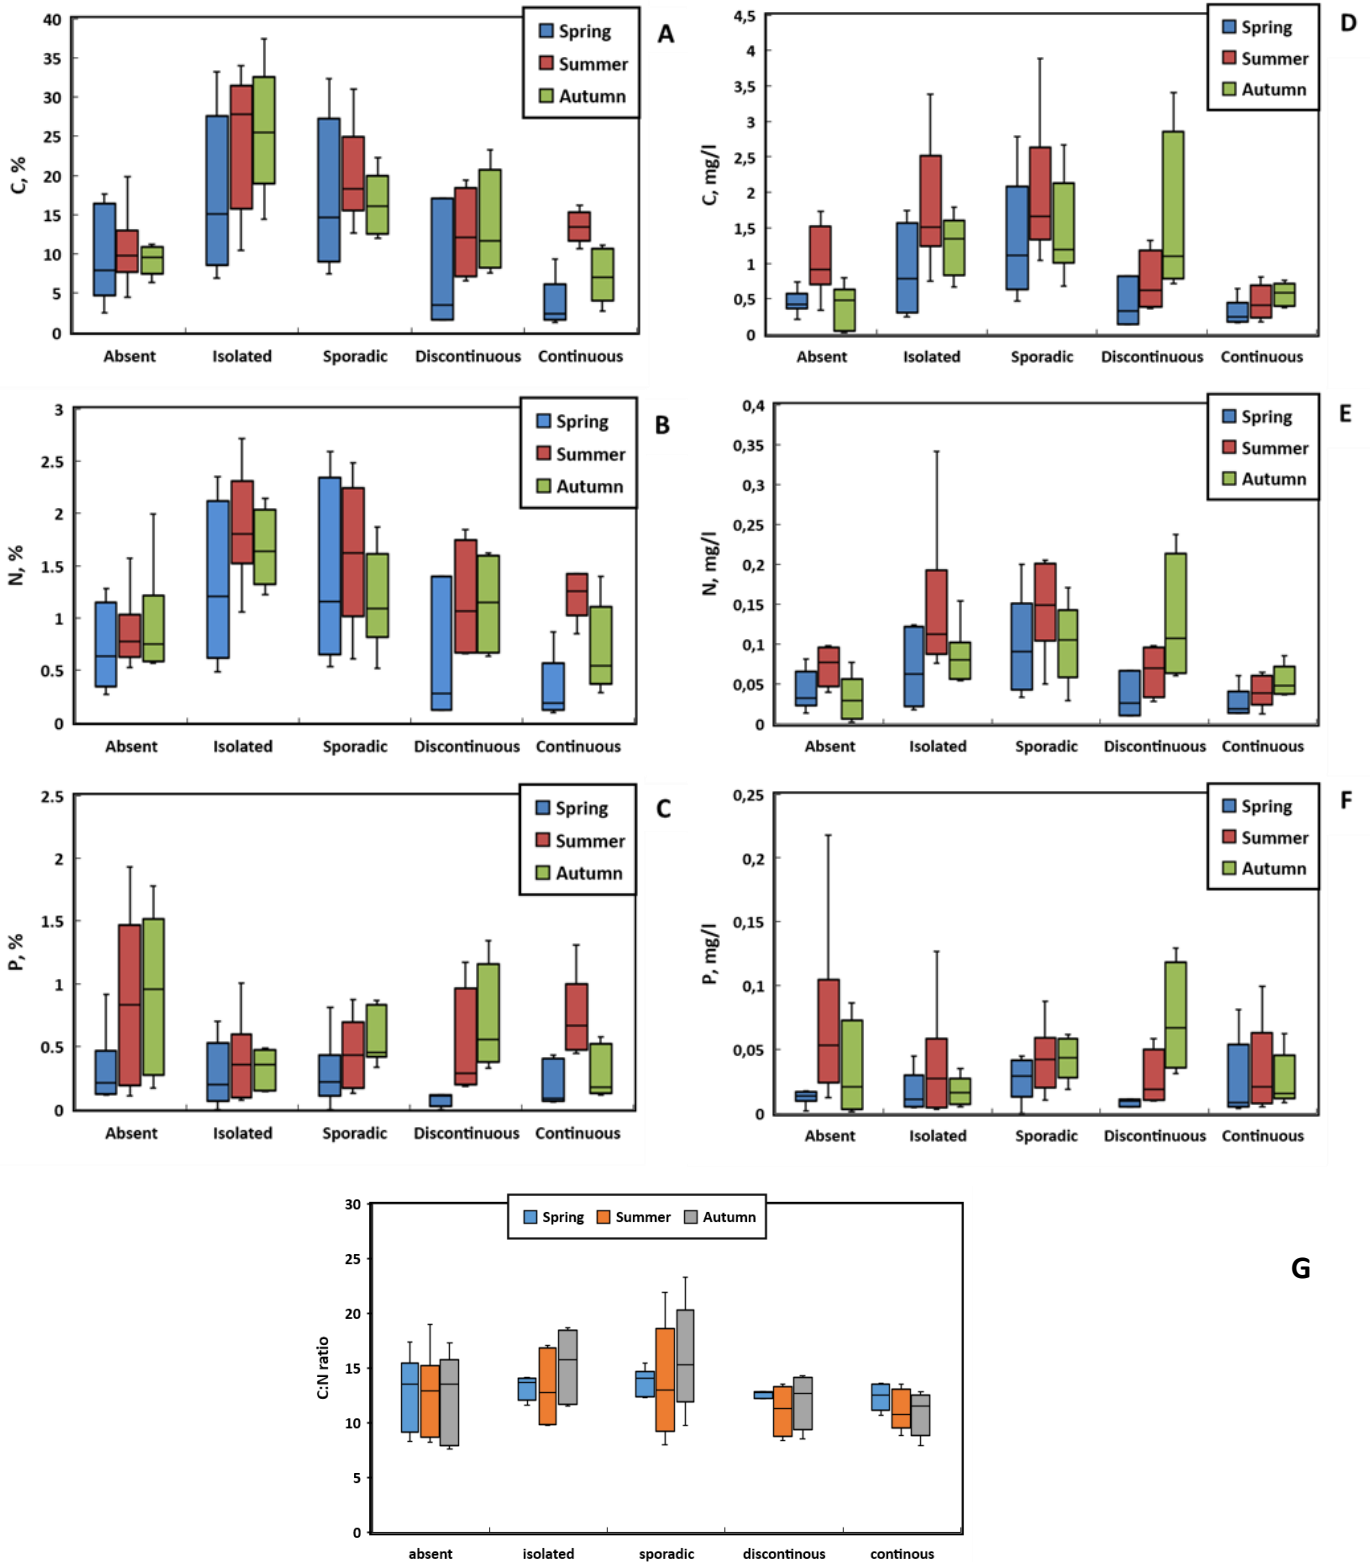

831

832

833 **Fig. 3.** Box plot of first and third quartiles (25 and 75%) of C (A), N (B) and P (C) concentration  
 834 in RSM (%) in five permafrost zones over three seasons. The C, N and P concentrations in the  
 835 river water are shown in panels D, E and F, respectively, and a C:N ratio is shown in G.

836

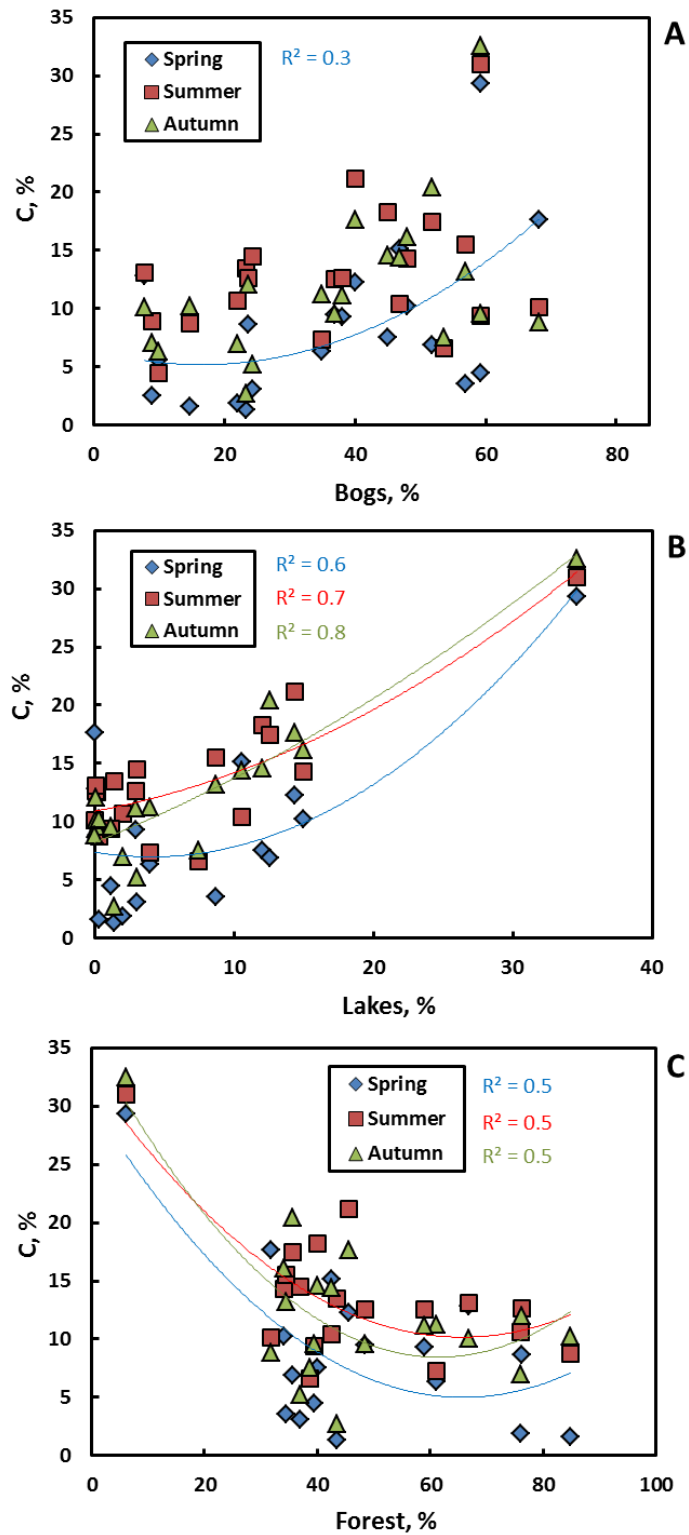

837

838

839 **Fig. 4.** The dependence of C concentration in RSM (%) on the coverage of watershed by bogs

840 (A), lakes (B) and forest (C). The solid lines represent 2<sup>nd</sup> degree polynomial fitting of the data

841 with regression coefficients shown for each season in corresponding panels.

842

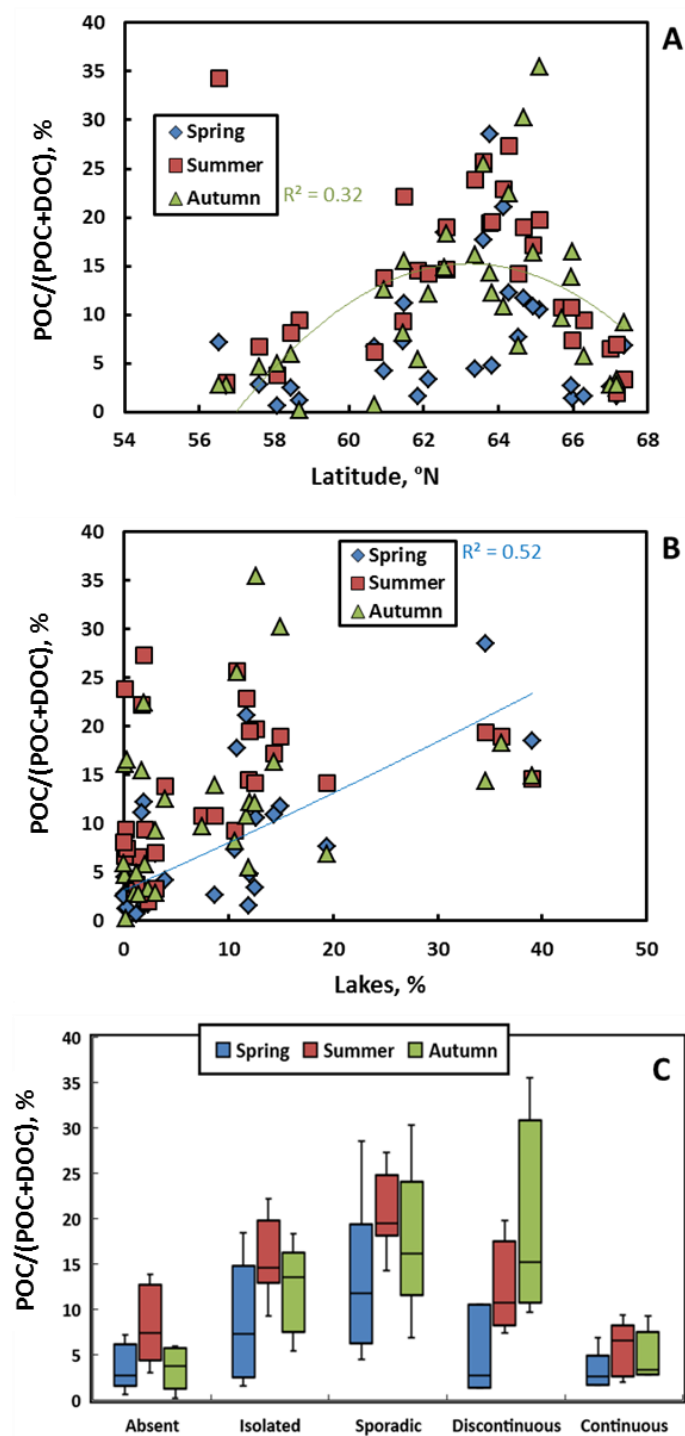

844

845

846

847 **Fig. 5.** Fraction of particulate OC of total (dissolved + particulate) form plotted as a function of  
 848 latitude (A), lake fraction on the watershed (B) and a box plot of fractions for 5 permafrost zones  
 849 (C). The solid lines in A and B represent 2<sup>nd</sup> degree polynomial (A, autumn) and linear (B,  
 850 spring) fitting of the data with regression coefficients equal to 0.32 and 0.52, respectively.

851

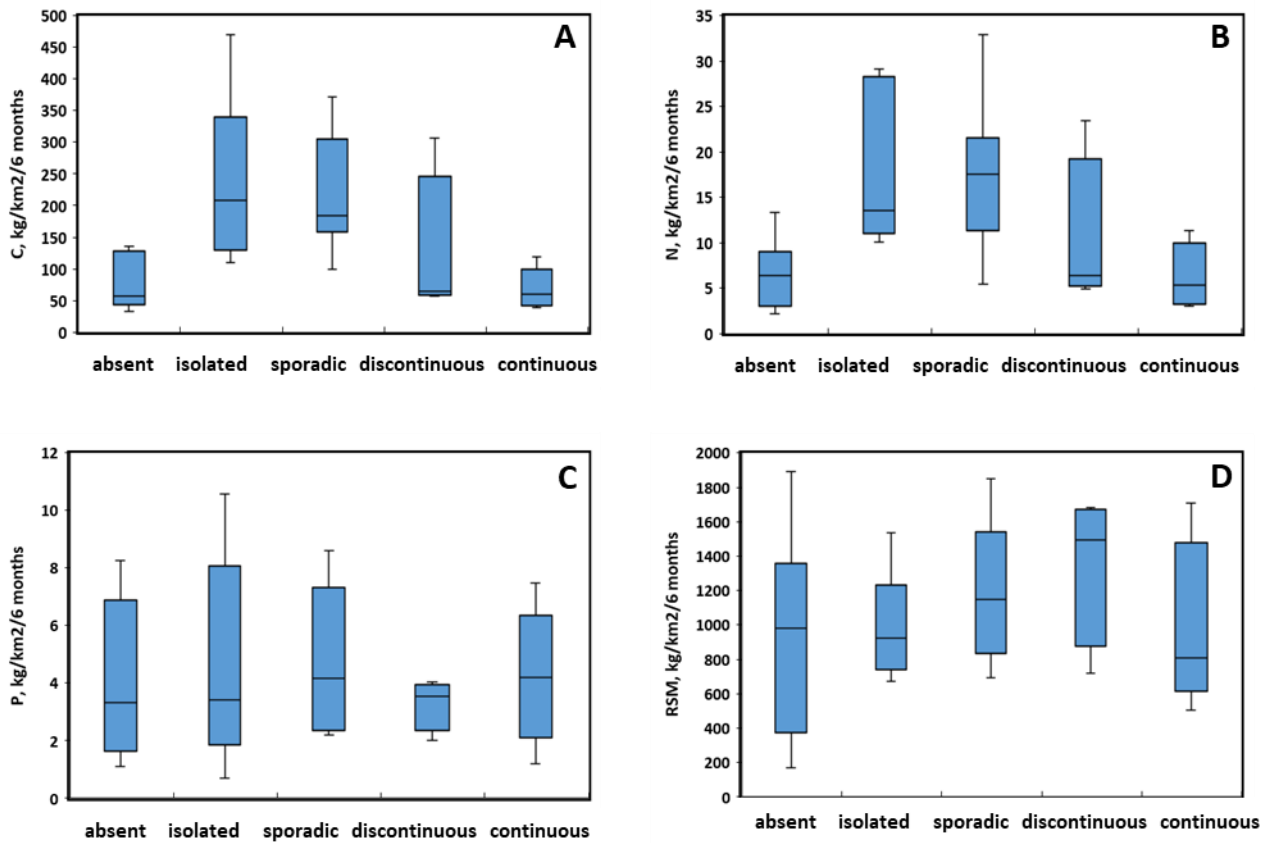

852

853

854 **Fig. 6.** Total open-water seasons fluxes of particulate C (A), N (B), P (C) and suspended  
855 matter (D) in 5 permafrost-free and 4 distinct permafrost zones of WSL (box plots of 1<sup>st</sup> and  
856 3<sup>rd</sup> quartiles). There is a clear maximum of C and N export at the beginning of permafrost  
857 appearance, in isolated to sporadic permafrost zone.

858

859



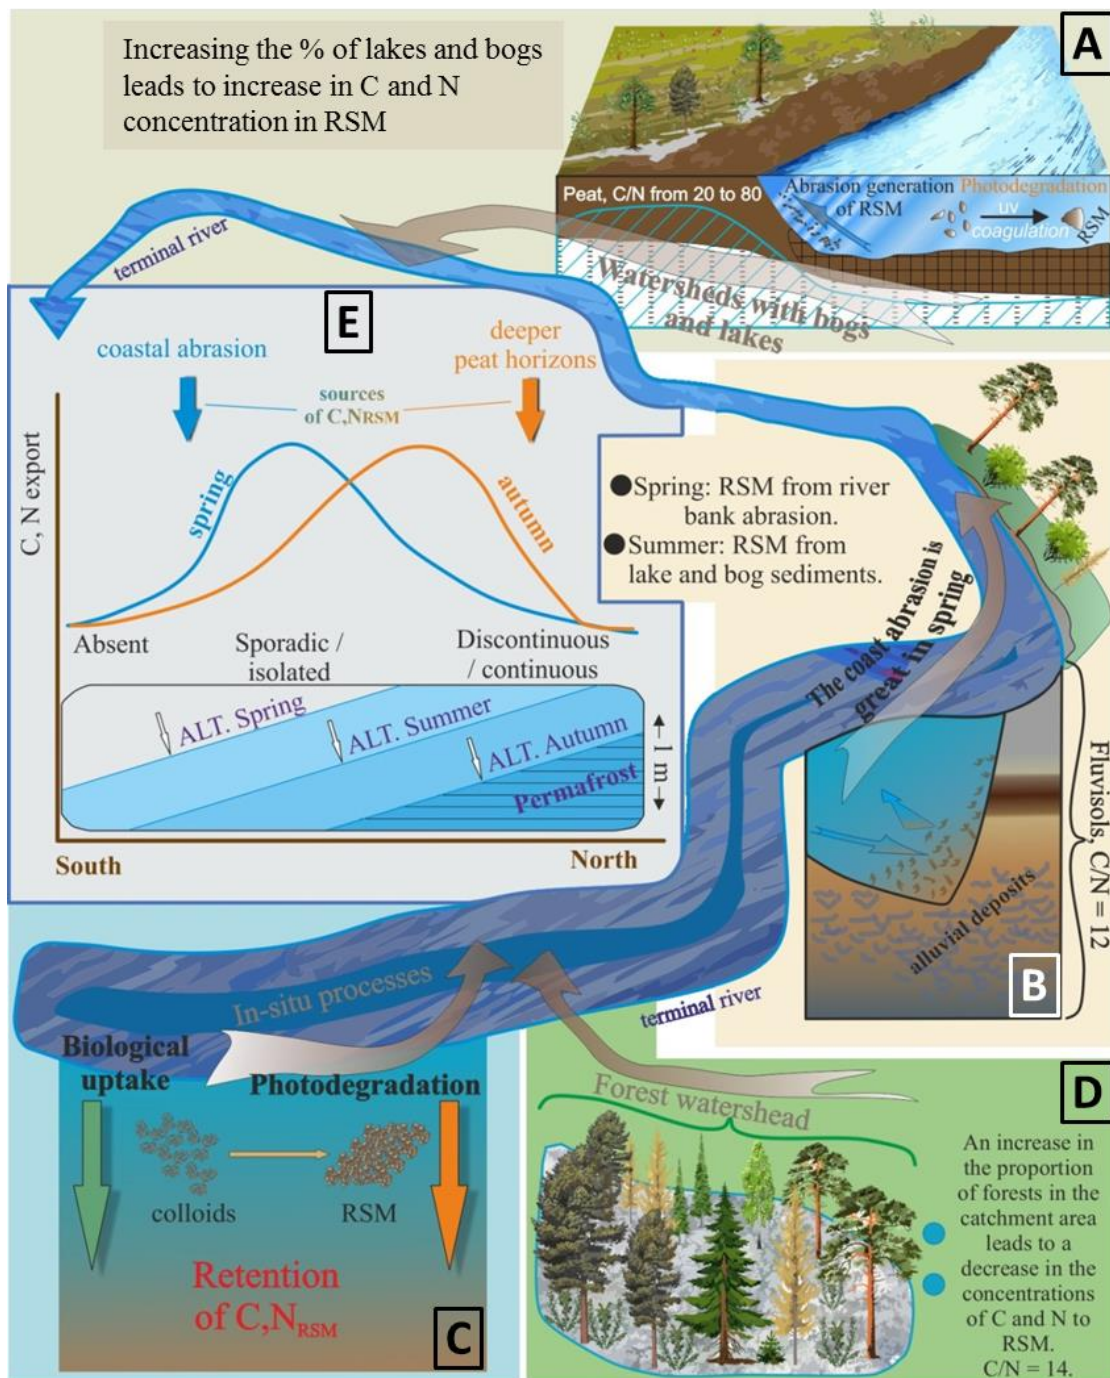

860

861 **Fig. 7.** A cartoon of spatial and temporal partitioning of particulate nutrients in WSL rivers  
 862 across the permafrost gradient. The panels **A**, **B**, **C** and **D** represent from main sources (**A**, lakes  
 863 and bogs in summer and **B**, alluvial deposits in spring) and sinks (**C**, photo- and bio-degradation)  
 864 and **D**, uptake by taiga forest) of particulate nutrients in WSL rivers. The panel **E** depicts the  
 865 spatial gradient of C and N in RSM occurring in spring (blue line) and autumn (red line). A non  
 866 steady-state physical erosion of peat soils in WSL provides the maximum of particulate nutrients  
 867 within the zone of most “fragile”, actively thawing permafrost. The maximal thickness of active  
 868 layer progressively moves to the north during the active season thus leading to the maximal  
 869 removal of particulate C, N, and P at the thawing front.

870

871 **Table 1.** Mean ( $\pm$  SD) values of RSM, C, N, P concentration (mass %) and relative proportion  
872 of suspended C and P overall total concentration for 5 permafrost zones and 3 seasons across the  
873 WSL transect.

| Season | Variable                      | Permafrost      |                 |                 |                  |                 |
|--------|-------------------------------|-----------------|-----------------|-----------------|------------------|-----------------|
|        |                               | Absent          | Isolated        | Sporadic        | Discontinuous    | Continuous      |
| Spring | RSM, mg/l                     | 6.2 $\pm$ 4.9   | 4.9 $\pm$ 1.5   | 7.2 $\pm$ 3.0   | 7.7 $\pm$ 2.5    | 10.2 $\pm$ 4.9  |
|        | C, %                          | 12.7 $\pm$ 13.0 | 17.5 $\pm$ 6.5  | 21 $\pm$ 14     | 7.4 $\pm$ 8.5    | 3.6 $\pm$ 3.2   |
|        | N, %                          | 1.4 $\pm$ 1.5   | 1.3 $\pm$ 0.8   | 1.8 $\pm$ 1.8   | 0.6 $\pm$ 0.7    | 0.3 $\pm$ 0.3   |
|        | P, %                          | 0.32 $\pm$ 0.28 | 0.33 $\pm$ 0.26 | 0.30 $\pm$ 0.25 | 0.11 $\pm$ 0.004 | 0.21 $\pm$ 0.18 |
|        | % C <sub>RSM</sub> of total C | 3.5 $\pm$ 2.4   | 8.4 $\pm$ 6.7   | 13.2 $\pm$ 7.9  | 4.9 $\pm$ 5.0    | 3.1 $\pm$ 2.2   |
|        | % P <sub>RSM</sub> of total P | 30.0 $\pm$ 21.5 | 59.2 $\pm$ 18.7 | 55.6 $\pm$ 21.9 | 40.2 $\pm$ 36.2  | 44.5 $\pm$ 30.4 |
| Summer | RSM, mg/l                     | 10.0 $\pm$ 4.6  | 7.5 $\pm$ 2.9   | 10.2 $\pm$ 3.7  | 5.8 $\pm$ 1.5    | 3.6 $\pm$ 2.5   |
|        | C, %                          | 10.7 $\pm$ 4.6  | 24.7 $\pm$ 8.9  | 20.0 $\pm$ 6.0  | 12.6 $\pm$ 5.9   | 13.5 $\pm$ 2.1  |
|        | N, %                          | 0.9 $\pm$ 0.3   | 1.9 $\pm$ 0.6   | 1.6 $\pm$ 0.7   | 1.2 $\pm$ 0.6    | 1.2 $\pm$ 0.2   |
|        | P, %                          | 0.86 $\pm$ 0.68 | 0.39 $\pm$ 0.34 | 0.45 $\pm$ 0.27 | 0.48 $\pm$ 0.46  | 0.72 $\pm$ 0.34 |
|        | % C <sub>RSM</sub> of total C | 10.7 $\pm$ 10.1 | 15.6 $\pm$ 4.4  | 21.0 $\pm$ 4.2  | 12.2 $\pm$ 5.3   | 5.6 $\pm$ 3.0   |
|        | % P <sub>RSM</sub> of P total | 57.0 $\pm$ 25.2 | 53.5 $\pm$ 21.8 | 67.9 $\pm$ 17.8 | 55.1 $\pm$ 28.7  | 32.6 $\pm$ 18.7 |
| Autumn | RSM, mg/l                     | 3.4 $\pm$ 2.4   | 5.1 $\pm$ 1.4   | 8.7 $\pm$ 3.3   | 10.7 $\pm$ 2.6   | 8.9 $\pm$ 3.4   |
|        | C, %                          | 11.0 $\pm$ 6.0  | 25.7 $\pm$ 8.0  | 17.4 $\pm$ 6.5  | 13.6 $\pm$ 6.9   | 7.3 $\pm$ 3.5   |
|        | N, %                          | 0.9 $\pm$ 0.5   | 1.7 $\pm$ 0.4   | 1.2 $\pm$ 0.5   | 1.1 $\pm$ 0.5    | 0.7 $\pm$ 0.4   |
|        | P, %                          | 0.93 $\pm$ 0.64 | 0.33 $\pm$ 0.15 | 0.57 $\pm$ 0.21 | 0.70 $\pm$ 0.45  | 0.30 $\pm$ 0.21 |
|        | % C <sub>RSM</sub> of total C | 4.35 $\pm$ 3.9  | 12.4 $\pm$ 4.8  | 17.2 $\pm$ 7.5  | 18.9 $\pm$ 11.4  | 4.8 $\pm$ 2.8   |
|        | % P <sub>RSM</sub> of P total | 42.8 $\pm$ 32.7 | 71.9 $\pm$ 9.9  | 82.8 $\pm$ 11.4 | 76.9 $\pm$ 14.0  | 40.8 $\pm$ 8.6  |

874

875

876

877

878

879

880

**SUPPLEMENTARY INFORMATION:**

881 **Physico-geographical parameters of rivers, results of statistical treatment, latitudinal**  
 882 **pattern of nutrient concentrations for rivers of different size, and impact of permafrost on**  
 883 **nutrient concentration in rivers.**

884

885 **Table S1.** The physico-geographical characteristics of the catchments as determined by  
 886 digitalizing available soil, vegetation, lithology and geocryology maps.

| No on map | N            | E            | Description          | Sarea, km <sup>2</sup> | runoff mm.yr | bogs, % | forest, % | lakes, % | PF, % | Type of permafrost |
|-----------|--------------|--------------|----------------------|------------------------|--------------|---------|-----------|----------|-------|--------------------|
| 24        | 65°06'48.8"  | 77°47'58.8"  | Tydylyakha           | 7.5                    | 185          | 49.4    | 37.4      | 12.7     | 49    | Discontinuous      |
| 2         | 56°43'15.0"  | 83°55'35.1"  | Chybyr'              | 8.1                    | 44.8         | 19.9    | 28.4      | 1.01     | 0     | Absent             |
| 11        | 61°50'28.6"  | 70°50'28.2"  | Vachinguriyagun      | 9.5                    | 192          | 78.7    | 9.4       | 11.9     | 0     | Isolated           |
| 13        | 62°37'08.4"  | 74°10'15.9"  | Petriyagun           | 9.7                    | 192          | 57.2    | 6.7       | 36.1     | 5     | Isolated           |
| 21        | 64°32'07.9"  | 76°54'21.3"  | Seryareyakha         | 15.2                   | 186          | 61.2    | 19.4      | 19.4     | 60    | Sporadic           |
| 19        | 64°09'06.4"  | 75°22'18.1"  | Apoku-Yakha          | 18.8                   | 186          | 75.5    | 12.8      | 11.7     | 38    | Sporadic           |
| 14        | 62°33'39.8"  | 74°00'29.5"  | Pintyr'yagun         | 33.5                   | 192          | 61      | 0         | 39       | 8     | Isolated           |
| 16        | 63°36'48.2"  | 74°35'28.6"  | Khatytayakha         | 34.6                   | 194          | 75.3    | 13.2      | 10.8     | 38    | Sporadic           |
| 20        | 64°17'31.9"  | 75°44'33.4"  | Etu-Yakha            | 71.6                   | 186          | 23.4    | 71.5      | 1.96     | 23    | Sporadic           |
| 31        | 67°09'24.81" | 78°57'31.76" | Sambotoyakha         | 75.0                   | N.D.         | 26.3    | 0.45      | 2.3      | 71    | Continuous         |
| 25        | 65°23'34.1"  | 77°45'46.7"  | Ponie-yakha          | 78.9                   | 185          | 66      | 17.7      | 16.3     | 70    | Discontinuous      |
| 10        | 61°29'11.1"  | 74°09'42.9"  | Vach-Yagun           | 98.9                   | 192          | 77.9    | 17.2      | 1.7      | 0     | Isolated           |
| 17        | 63°47'04.5"  | 75°37'06.8"  | Lymbyd'yakha         | 115                    | 194          | 59.3    | 6.1       | 34.6     | 30    | Sporadic           |
| 6         | 58°40'46.5"  | 84°27'56.6"  | Vyalovka             | 117                    | 127          | 37      | 48.4      | 0.19     | 0     | Absent             |
| 30        | 66°59'25.84" | 79°22'30.02" | Malaya Kheyaha       | 137                    | N.D.         | 23.4    | 43.4      | 1.4      | 75    | Continuous         |
| 15        | 63°22'01.6"  | 74°31'53.2"  | Kamgayakha           | 175                    | 194          | 23.7    | 76.2      | 0.1      | 12    | Sporadic           |
| 3         | 57°36'43.3"  | 83°37'02.1"  | Malyi Tatosh         | 302                    | 63.4         | 7.89    | 66.9      | 0.09     | 0     | Absent             |
| 28        | 65°59'14.7"  | 78°32'25.2"  | Malaya Khadyr-Yakha  | 513                    | 278          | 14.8    | 84.9      | 0.3      | 85    | Discontinuous      |
| 32        | 67°10'54.8"  | 78°51'04.5"  | Nuny-Yakha           | 656                    | 312          | 24.3    | 37        | 3.05     | 72    | Continuous         |
| 29        | 66°17'10.8"  | 79°15'06.1"  | Ngarka Khadyta-Yakha | 1970                   | 277          | 22      | 76        | 2        | 50    | Continuous         |
| 5         | 58°26'06.9"  | 82°05'43.6"  | Shudelka             | 3460                   | 211          | 68.2    | 31.8      | 0.0      | 0     | Absent             |
| 26        | 65°41'51.1"  | 78°01'05.0"  | Yamsovey             | 4030                   | 309          | 53.7    | 38.7      | 7.5      | 54    | Discontinuous      |
| 22        | 64°40'14.0"  | 77°05'27.2"  | Purpe                | 5110                   | 309          | 48      | 34        | 15       | 48    | Sporadic           |
| 18        | 63°49'54.2"  | 75°22'47.1"  | Pyakupur             | 9881                   | 324          | 45      | 40        | 12       | 34    | Sporadic           |
| 12        | 62°07'50.0"  | 73°44'05.6"  | Tromyegan            | 10770                  | 263          | 51.9    | 35.6      | 12.6     | 10    | Isolated           |
| 23        | 64°55'55.1"  | 77°56'08.2 " | Aivasedapur          | 26100                  | 309          | 40.1    | 45.5      | 14.4     | 20    | Sporadic           |
| 9         | 58°04'20.8"  | 82°49'19.7"  | Chaya                | 27622                  | 291          | 46.9    | 42.5      | 10.6     | 5     | Absent             |
| 4         | 61°26'13.6"  | 74°47'39.7"  | Agan                 | 27600                  | 291          | 46.9    | 42.5      | 10.6     | 5     | Isolated           |
| 8         | 60°55'41.0"  | 76°53'49.3"  | Vakh                 | 75090                  | 298          | 35      | 61        | 4        | 5     | Absent             |
| 27        | 65°57'05.5"  | 78°18'59.1"  | Pur                  | 112000                 | 298          | 56.9    | 34.4      | 8.7      | 34    | Discontinuous      |
| 33        | 67°22'13.28" | 79°00'25.9"  | Taz                  | 150000                 | 330          | 38      | 59        | 3        | 59    | Continuous         |
| 1         | 59°03'45.5"  | 80°52'08.9"  | Ob'                  | 520000                 | N.D.         | 9       | N.D.      | N.D.     | 0     | Absent             |
| 7         | 60°40'28.8"  | 77°31'29.4"  | Ob'                  | 773200                 | 216          | 10      | N.D.      | N.D.     | 0     | Absent             |

887 PF is for permafrost, % of watershed coverage. Full dataset of measured parameters is available at the Research gate  
 888 (DOI:10.13140/RG.2.2.36650.93121); <https://www.researchgate.net/publication/325334684>.

889

890 **Table S2.** Correlation matrix of watershed physico-geographical parameters and particulate  
 891 nutrient concentration. All rivers, June and August and September. Marked (bold and red)  
 892 Pearson correlations  $R > 0.28$  are significant at  $p < 0.09$ . Lat and Permaf. are for Latitude ( $^{\circ}$  N)  
 893 and permafrost coverage of the watershed, %. The runoff is in  $\text{mm y}^{-1}$  and bogs, forest and lakes  
 894 represent the % coverage in the watershed

895

| Spring 2016                   |                               |              |                    |              |              |              |              |              |
|-------------------------------|-------------------------------|--------------|--------------------|--------------|--------------|--------------|--------------|--------------|
| permafrost-free<br>(N=8)      |                               | Lat          | S, km <sup>2</sup> | runoff       | Bogs         | Forest       | Lakes        | Permaf       |
|                               | RSM, mg/l                     | <b>0.87</b>  | <b>0.91</b>        | 0.67         | 0.12         | 0.62         | <b>0.79</b>  | -            |
|                               | N, %                          | -0.61        | -0.38              | -0.44        | -0.33        | -0.60        | -0.12        | -            |
|                               | C, %                          | -0.65        | -0.47              | -0.46        | -0.34        | -0.59        | -0.23        | -            |
|                               | % C <sub>RSM</sub> of total C | 0.44         | 0.49               | 0.53         | -0.38        | 0.36         | 0.58         | -            |
|                               | P                             | -0.19        | -0.37              | -0.18        | -0.28        | 0.51         | -0.49        | -            |
|                               | % P <sub>RSM</sub> of P total | <b>0.95</b>  | <b>0.88</b>        | <b>0.87</b>  | 0.03         | 0.62         | <b>0.80</b>  | -            |
| permafrost-bearing<br>(N=24)  | RSM, mg/l                     | <b>0.55</b>  | -0.004             | 0.11         | -0.39        | 0.19         | -0.24        | <b>0.52</b>  |
|                               | N, %                          | <b>-0.55</b> | -0.16              | <b>-0.53</b> | <b>0.66</b>  | <b>-0.69</b> | <b>0.72</b>  | <b>-0.50</b> |
|                               | C, %                          | <b>-0.55</b> | -0.21              | <b>-0.56</b> | <b>0.66</b>  | <b>-0.72</b> | <b>0.78</b>  | <b>-0.48</b> |
|                               | % C <sub>RSM</sub> of total C | -0.29        | -0.16              | -0.38        | <b>0.47</b>  | <b>-0.61</b> | <b>0.75</b>  | -0.25        |
|                               | P                             | -0.28        | 0.05               | -0.13        | 0.33         | -0.24        | -0.10        | -0.36        |
| % P <sub>RSM</sub> of P total | -0.24                         | -0.15        | <b>-0.44</b>       | 0.34         | <b>-0.51</b> | <b>0.40</b>  | -0.27        |              |
| Summer 2016                   |                               |              |                    |              |              |              |              |              |
| permafrost-free<br>(N=8)      | RSM, mg/l                     | <b>0.76</b>  | 0.42               | 0.67         | 0.38         | 0.18         | 0.34         | -            |
|                               | N, %                          | -0.55        | -0.27              | -0.43        | -0.53        | -0.39        | -0.01        | -            |
|                               | C, %                          | <b>-0.81</b> | -0.66              | <b>-0.76</b> | -0.54        | -0.41        | -0.43        | -            |
|                               | % C <sub>RSM</sub> of total C | <b>0.92</b>  | 0.63               | <b>0.87</b>  | 0.05         | 0.57         | 0.56         | -            |
|                               | P                             | -0.54        | <b>-0.81</b>       | -0.57        | -0.44        | 0.21         | <b>-0.82</b> | -            |
| % P <sub>RSM</sub> of P total | 0.53                          | 0.01         | 0.52               | 0.20         | 0.41         | -0.15        | -            |              |
| permafrost-bearing<br>(N=24)  | RSM, mg/l                     | <b>-0.43</b> | <b>-0.38</b>       | <b>-0.40</b> | <b>0.55</b>  | -0.30        | -0.05        | -0.28        |
|                               | N, %                          | -0.35        | 0.06               | -0.10        | <b>0.60</b>  | <b>-0.67</b> | <b>0.50</b>  | <b>-0.41</b> |
|                               | C, %                          | <b>-0.53</b> | -0.24              | <b>-0.61</b> | <b>0.63</b>  | <b>-0.78</b> | <b>0.76</b>  | <b>-0.52</b> |
|                               | % C <sub>RSM</sub> of total C | <b>-0.53</b> | <b>-0.45</b>       | <b>-0.58</b> | <b>0.38</b>  | -0.26        | 0.20         | <b>-0.50</b> |
|                               | P                             | 0.29         | 0.24               | 0.34         | -0.24        | 0.32         | <b>-0.46</b> | 0.05         |
| % P <sub>RSM</sub> of P total | -0.27                         | -0.28        | -0.16              | 0.35         | -0.21        | -0.17        | -0.22        |              |
| Autumn 2016                   |                               |              |                    |              |              |              |              |              |
| permafrost-free<br>(N=8)      | RSM, mg/l                     | 0.29         | 0.52               | 0.45         | 0.41         | -0.01        | 0.40         | -            |
|                               | N, %                          | -0.13        | 0.20               | -0.09        | -0.39        | -0.31        | 0.45         | -            |
|                               | C, %                          | -0.51        | -0.20              | -0.43        | -0.44        | -0.47        | 0.08         | -            |
|                               | % C <sub>RSM</sub> of total C | 0.74         | <b>0.88</b>        | <b>0.78</b>  | 0.12         | 0.37         | <b>0.83</b>  | -            |
|                               | P                             | -0.45        | -0.74              | -0.46        | 0.01         | -0.12        | <b>-0.88</b> | -            |
|                               | % P <sub>RSM</sub> of P total | 0.29         | 0.52               | 0.45         | 0.41         | -0.01        | 0.40         | -            |
| permafrost-bearing<br>(N=24)  | RSM, mg/l                     | <b>0.51</b>  | -0.12              | 0.09         | -0.17        | 0.19         | -0.34        | <b>0.61</b>  |
|                               | N, %                          | <b>-0.55</b> | 0.17               | -0.23        | <b>0.70</b>  | <b>-0.64</b> | <b>0.60</b>  | <b>-0.61</b> |
|                               | C, %                          | <b>-0.69</b> | -0.18              | <b>-0.50</b> | <b>0.60</b>  | <b>-0.66</b> | <b>0.78</b>  | <b>-0.67</b> |
|                               | % C <sub>RSM</sub> of total C | -0.16        | -0.13              | -0.21        | 0.12         | -0.02        | 0.17         | -0.12        |
|                               | P                             | 0.17         | 0.05               | 0.28         | <b>-0.36</b> | <b>0.60</b>  | <b>-0.36</b> | 0.26         |
| % P <sub>RSM</sub> of P total | <b>-0.42</b>                  | -0.23        | <b>-0.43</b>       | <b>0.37</b>  | -0.29        | 0.32         | -0.28        |              |

| All seasons                  |                               |              |              |              |              |              |              |              |
|------------------------------|-------------------------------|--------------|--------------|--------------|--------------|--------------|--------------|--------------|
| permafrost-free<br>(N=24)    | RSM, mg/l                     | 0.41         | 0.35         | 0.37         | 0.14         | 0.36         | 0.27         | -            |
|                              | N, %                          | <b>-0.47</b> | -0.25        | -0.39        | <b>-0.53</b> | -0.42        | -0.03        | -            |
|                              | C, %                          | <b>-0.61</b> | -0.42        | <b>-0.51</b> | <b>-0.52</b> | <b>-0.55</b> | -0.19        | -            |
|                              | % C <sub>RSM</sub> of total C | <b>0.62</b>  | <b>0.58</b>  | <b>0.64</b>  | -0.01        | <b>0.50</b>  | <b>0.54</b>  | -            |
|                              | P                             | -0.25        | <b>-0.50</b> | -0.20        | 0.24         | -0.26        | <b>-0.56</b> | -            |
|                              | % P <sub>RSM</sub> of P total | <b>0.48</b>  | 0.32         | <b>0.56</b>  | 0.33         | 0.31         | 0.20         | -            |
| permafrost-bearing<br>(N=70) | RSM, mg/l                     | 0.18         | -0.18        | -0.09        | 0.03         | 0.01         | -0.20        | <b>0.26</b>  |
|                              | N, %                          | <b>-0.44</b> | 0.01         | <b>-0.27</b> | <b>0.60</b>  | <b>-0.62</b> | <b>0.55</b>  | <b>-0.47</b> |
|                              | C, %                          | <b>-0.57</b> | <b>-0.21</b> | <b>-0.54</b> | <b>0.60</b>  | <b>-0.69</b> | <b>0.74</b>  | <b>-0.54</b> |
|                              | % C <sub>RSM</sub> of total C | <b>-0.29</b> | <b>-0.23</b> | <b>-0.36</b> | <b>0.29</b>  | <b>-0.25</b> | <b>0.32</b>  | <b>-0.26</b> |
|                              | P                             | 0.12         | 0.11         | 0.19         | -0.15        | <b>0.28</b>  | <b>-0.32</b> | 0.03         |
|                              | % P <sub>RSM</sub> of P total | <b>-0.28</b> | <b>-0.21</b> | <b>-0.32</b> | <b>0.33</b>  | <b>-0.31</b> | 0.15         | <b>-0.24</b> |

896

897 Correlation matrix of watershed physico-geographical parameters and particulate nutrient  
898 concentration. All rivers, all seasons,  $p < 0.05$

|                              |                               | Latitude     | S, km <sup>2</sup> | runoff       | Bogs         | Forest       | Lakes        | Permaf       |
|------------------------------|-------------------------------|--------------|--------------------|--------------|--------------|--------------|--------------|--------------|
| permafrost-free<br>(N=24)    | RSM. mg/l                     | 0.41         | 0.35               | 0.37         | 0.14         | 0.36         | 0.27         | -            |
|                              | N. %                          | -0.47        | -0.25              | -0.39        | <b>-0.53</b> | -0.42        | -0.03        | -            |
|                              | C. %                          | <b>-0.61</b> | -0.42              | -0.51        | <b>-0.52</b> | <b>-0.55</b> | -0.19        | -            |
|                              | % C <sub>RSM</sub> of total C | <b>0.62</b>  | <b>0.58</b>        | <b>0.64</b>  | -0.01        | 0.50         | <b>0.54</b>  | -            |
|                              | P                             | -0.25        | -0.50              | -0.20        | 0.24         | -0.26        | <b>-0.56</b> | -            |
|                              | % P <sub>RSM</sub> of P total | 0.48         | 0.32               | <b>0.56</b>  | 0.33         | 0.31         | 0.20         | -            |
| permafrost-bearing<br>(N=70) | RSM. mg/l                     | 0.18         | -0.18              | -0.09        | 0.03         | 0.01         | -0.20        | <b>0.26</b>  |
|                              | N. %                          | <b>-0.44</b> | 0.01               | <b>-0.27</b> | <b>0.60</b>  | <b>-0.62</b> | <b>0.55</b>  | <b>-0.47</b> |
|                              | C. %                          | <b>-0.57</b> | -0.21              | <b>-0.54</b> | <b>0.60</b>  | <b>-0.69</b> | <b>0.74</b>  | <b>-0.54</b> |
|                              | % C <sub>RSM</sub> of total C | <b>-0.29</b> | -0.23              | <b>-0.36</b> | <b>0.29</b>  | <b>-0.25</b> | <b>0.32</b>  | <b>-0.26</b> |
|                              | P                             | 0.12         | 0.11               | 0.19         | -0.15        | <b>0.28</b>  | <b>-0.32</b> | 0.03         |
|                              | % P <sub>RSM</sub> of P total | <b>-0.28</b> | -0.21              | <b>-0.32</b> | <b>0.33</b>  | <b>-0.31</b> | 0.15         | <b>-0.24</b> |

899

900

901

902

903

904

905

906

907

908

909

910

911

912

913 **Table S3.** Compilation of statistical parameters for the differences in RSM, C, N and P  
 914 concentration (N=32) among watersheds of different size (<100, 100-1000, 1000-50000, >50000  
 915 km<sup>2</sup>)

916 **Table S3-A:** Non-parametric H-criterion Kruskal Wallis for un-paired data, at p < 0.05

| Season | Variable | H     | p-level       |
|--------|----------|-------|---------------|
| Spring | RSM      | -     | -             |
|        | C        | 10.98 | <b>0.0118</b> |
|        | N        | 10.55 | <b>0.0145</b> |
|        | P        | -     | -             |
| Summer | RSM      | -     | -             |
|        | C        | 15,74 | <b>0.0013</b> |
|        | N        | -     | -             |
|        | P        | -     | -             |
| Autumn | RSM      | -     | -             |
|        | C        | 11,02 | <b>0,0116</b> |
|        | N        | 10,72 | <b>0,0133</b> |
|        | P        | -     | -             |

917

918 **Table S3-B:** Impact of the watershed area ( $S_{\text{watershed}}$ ) on RSM and nutrient concentration. Mann-  
 919 Whitney U test, statistically significant (at p < 0.05) differences are in bold red. (N=32)

| Water shed, km <sup>2</sup> | Variable  |        |              |               |        |              |              |        |              |              |
|-----------------------------|-----------|--------|--------------|---------------|--------|--------------|--------------|--------|--------------|--------------|
|                             |           | Spring |              |               | Summer |              |              | Autumn |              |              |
|                             |           | U      | Z            | p-level       | U      | Z            | p-level      | U      | Z            | p-level      |
| <100/1000                   | RSM, mg/l | 20.0   | -            | 0.1571        | 28.0   | 0.906        | 0.365        | 37.00  | 0.091        | 0.928        |
|                             | C, %      | 11.0   | <b>2.294</b> | <b>0.0218</b> | 10.0   | <b>2.537</b> | <b>0.011</b> | 12.00  | <b>2.355</b> | <b>0.019</b> |
|                             | N, %      | 10.0   | <b>2.391</b> | <b>0.0168</b> | 16.0   | <b>1.992</b> | <b>0.046</b> | 9.00   | <b>2.626</b> | <b>0.009</b> |
|                             | P, %      | 25.0   | -            | 0.525         | 23.0   | -1.359       | 0.174        | 32.00  | -0.543       | 0.587        |
| 100-1000/1000-50000         | RSM, mg/l | 26.0   | 0.174        | 0.862         | 21.0   | -1.059       | 0.290        | 22.50  | -0.900       | 0.368        |
|                             | C, %      | 23.0   | -            | 0.603         | 27.0   | 0.423        | 0.672        | 25.00  | -0.635       | 0.525        |
|                             | N, %      | 22.0   | -            | 0.524         | 24.0   | -0.741       | 0.459        | 17.00  | -1.481       | 0.138        |
|                             | P, %      | 26.0   | 0.174        | 0.862         | 31.0   | 0.0000       | 1.000        | 29.00  | -0.212       | 0.832        |
| 1000-50000/>50000           | RSM, mg/l | 8.00   | -            | 0.092         | 21.0   | 0.133        | 0.894        | 22.50  | -0.900       | 0.368        |
|                             | C, %      | 10.0   | 1.391        | 0.164         | 13.0   | 1.200        | 0.230        | 25.00  | -0.635       | 0.525        |
|                             | N, %      | 13.00  | 0.952        | 0.341         | 20.00  | 0.267        | 0.790        | 17.00  | -1.482       | 0.138        |
|                             | P, %      | 13.00  | 0.952        | 0.341         | 11.00  | 1.4667       | 0.1425       | 29.00  | -0.212       | 0.832        |

920

921

922

923 **Table S3-C.** Non-parametric H-criterion Kruskal Wallis for un-paired data, at  $p < 0.05$ . Difference  
 924 between parameters depending on type of permafrost (Absent, Isolated, Sporadic, Discontinuous,  
 925 Continuous)

| Season | Variable | H     | p-level       |
|--------|----------|-------|---------------|
| Spring | RSM      | -     | -             |
|        | C        | 12.07 | <b>0.017</b>  |
|        | N        | 10.59 | <b>0.031</b>  |
|        | P        | -     | -             |
| Summer | RSM      | 15.81 | <b>0.0033</b> |
|        | C        | 14.77 | <b>0.0052</b> |
|        | N        | 11.33 | <b>0.0230</b> |
|        | P        | -     | -             |
| Autumn | RSM      | 18.28 | <b>0.0004</b> |
|        | C        | 10.68 | <b>0.014</b>  |
|        | N        | 7.86  | <b>0.049</b>  |
|        | P        | -     | -             |

926

927 **Table S3-D.** Mann-Whitney U test of the difference in nutrient concentration between two  
 928 adjacent permafrost zones. Statistically significant (at  $p < 0.05$ ) differences are in bold red.  
 929 (N=32)

| Permafrost/                  | Variable  | Spring |        |         | Summer |              |              | Autumn |               |              |
|------------------------------|-----------|--------|--------|---------|--------|--------------|--------------|--------|---------------|--------------|
|                              |           | U      | Z      | p-level | U      | Z            | p-level      | U      | Z             | p-level      |
| Permafrost/<br>Absent        | RSM, mg/l | 61.0   | -1.266 | 0.205   | 63.5   | 1.414        | 0.157        | 22.0   | <b>-3.22</b>  | <b>0.001</b> |
|                              | C, %      | 82.0   | -0.281 | 0.778   | 33.0   | <b>-2.74</b> | <b>0.006</b> | 48.0   | <b>-2.09</b>  | <b>0.037</b> |
|                              | N, %      | 81.0   | -0.328 | 0.743   | 34.0   | <b>-2.70</b> | <b>0.007</b> | 68.0   | -1.22         | 0.223        |
|                              | P, %      | 70.0   | 0.683  | 0.495   | 71.0   | 1.088        | 0.277        | 61.0   | 1.52          | 0.128        |
| Absent/<br>Isolated          | RSM, mg/l | 19.0   | -0.073 | 0.942   | 14.5   | 1.162        | 0.245        | 14.0   | -1.226        | 0.220        |
|                              | C, %      | 11.0   | -1.244 | 0.213   | 4.0    | <b>-2.52</b> | <b>0.012</b> | 3.0    | <b>-2.647</b> | <b>0.008</b> |
|                              | N, %      | 11.0   | -1.244 | 0.213   | 2.0    | <b>-2.77</b> | <b>0.006</b> | 5.0    | <b>-2.388</b> | <b>0.017</b> |
|                              | P, %      | 20.0   | 0.452  | 0.651   | 13.0   | 1.356        | 0.175        | 11.0   | 1.614         | 0.107        |
| Sporadic/<br>Discontinuous   | RSM, mg/l | 13.0   | 0.0    | 1.0     | 2.0    | <b>2.39</b>  | <b>0.017</b> | 16.0   | -1.221        | 0.222        |
|                              | C, %      | 5.0    | 1.479  | 0.139   | 7.0    | 1.620        | 0.105        | 28.0   | 0.053         | 0.958        |
|                              | N, %      | 6.0    | 1.294  | 0.196   | 10.0   | 1.157        | 0.247        | 23.0   | -0.478        | 0.633        |
|                              | P, %      | 6.5    | 1.697  | 0.090   | 18.0   | -0.077       | 0.939        | 18.0   | -1.009        | 0.313        |
| Discontinuous/<br>Continuous | RSM, mg/l | 6.0    | -0.298 | 0.766   | 4.0    | 1.347        | 0.178        | 6.0    | 0.857         | 0.391        |
|                              | C, %      | 5.0    | 0.596  | 0.551   | 9.0    | -0.122       | 0.903        | 3.0    | 1.592         | 0.111        |
|                              | N, %      | 5.0    | 0.596  | 0.551   | 10.0   | 0.122        | 0.903        | 4.0    | 1.347         | 0.178        |
|                              | P, %      | 9.0    | -0.122 | 0.903   | 4.0    | -1.347       | 0.178        | 3.0    | 1.592         | 0.111        |

930

931 **Table S3-E.** Mann-Whitney U test for the impact of bog coverage of the watershed on RSM and  
 932 nutrient concentration, for < 10% and > 10% of lake coverage. Statistically significant (at p <  
 933 0.05) differences are in bold red. (N=30)

934

| Variable  | Spring |              |              | Summer |               |               | Autumn |               |               |
|-----------|--------|--------------|--------------|--------|---------------|---------------|--------|---------------|---------------|
|           | U      | Z            | p-level      | U      | Z             | p-level       | U      | Z             | p-level       |
| RSM, mg/l | 90.0   | 0.0          | 1.0          | 100.5  | -0.863        | 0.388         | 103.5  | -0.748        | 0.454         |
| C, %      | 44.0   | <b>-2.22</b> | <b>0.026</b> | 30.0   | <b>-3.568</b> | <b>0.0004</b> | 24.0   | <b>-3.799</b> | <b>0.0001</b> |
| N, %      | 44.0   | <b>-2.22</b> | <b>0.026</b> | 32.0   | <b>-3.492</b> | <b>0.0005</b> | 43.0   | <b>-3.070</b> | <b>0.0021</b> |
| P, %      | 76.0   | -0.386       | 0.700        | 63.0   | <b>2.302</b>  | <b>0.0213</b> | 104.0  | 0.729         | 0.4660        |

935

936

937 **Table S3-F.** Mann-Whitney U test for the impact of bog coverage of the watershed on RSM and  
 938 nutrient concentration, for < 50% and > 50% of bog coverage. Statistically significant (at p <  
 939 0.05) differences are in bold red (N=30)

940

| Variable  | Spring |               |              | Summer |              |              | Autumn |               |              |
|-----------|--------|---------------|--------------|--------|--------------|--------------|--------|---------------|--------------|
|           | U      | Z             | p-level      | U      | Z            | p-level      | U      | Z             | p-level      |
| RSM, mg/l | 83.0   | 0.904         | 0.366        | 93.5   | -1.132       | 0.258        | 119.0  | -0.153        | 0.878        |
| C, %      | 58.0   | <b>-1.980</b> | <b>0.048</b> | 63.0   | <b>-2.30</b> | <b>0.021</b> | 71.0   | <b>-1.995</b> | <b>0.046</b> |
| N, %      | 62.0   | -1.808        | 0.0707       | 70.0   | <b>-2.03</b> | <b>0.042</b> | 68.0   | <b>-2.110</b> | <b>0.035</b> |
| P, %      | 77.0   | -0.967        | 0.334        | 94.0   | 1.11         | 0.266        | 97.0   | 0.998         | 0.318        |

941

942

943 **Table S3-G.** Mann-Whitney U test for the impact of bog coverage of the watershed on RSM and  
 944 nutrient concentration, for < 30% and > 30% of forest coverage. Statistically significant (at p <  
 945 0.05) differences are in bold red. (N=30)

946

| Variable  | Spring |              |               | Summer |              |               | Autumn |               |               |
|-----------|--------|--------------|---------------|--------|--------------|---------------|--------|---------------|---------------|
|           | U      | Z            | p-level       | U      | Z            | p-level       | U      | Z             | p-level       |
| RSM, mg/l | 76.0   | -0.443       | 0.658         | 87.0   | 0.550        | 0.582         | 68.0   | -1.386        | 0.166         |
| C, %      | 31.0   | <b>2.656</b> | <b>0.0079</b> | 11.0   | <b>3.893</b> | <b>0.0001</b> | 29.0   | <b>3.102</b>  | <b>0.0019</b> |
| N, %      | 33.0   | <b>2.558</b> | <b>0.0105</b> | 38.0   | <b>2.705</b> | <b>0.007</b>  | 31.0   | <b>3.014</b>  | <b>0.0026</b> |
| P, %      | 80.0   | 0.0258       | 0.9795        | 57.0   | -1.869       | 0.062         | 46.0   | <b>-2.354</b> | <b>0.0186</b> |

947

948

949

950

951

952

953

954

955

956

957

958



959 **Table S4.** Mean C:N values in soils and lake sediments of WSL river watersheds.

960

| Site                                                                     | Mean $\pm$ SD   |
|--------------------------------------------------------------------------|-----------------|
| Cryosols in Tazovsky, south tundra, mineral soils                        | 14.0 $\pm$ 7.0  |
| Cryic Histosols, polygonal southern tundra in Tazovsky, (CkTz15)         | 24.3 $\pm$ 5.7  |
| Cryic Histosols, polygonal southern tundra in Tazovsky (CkTz14-2)        | 28.4 $\pm$ 10.7 |
| Cryic Histosols, depression over permafrost, southern tundra (CkTz14-3)  | 39.5 $\pm$ 20.1 |
| Soil of recently drained lakes, south tundra, Tazovsky, 2016             | 22.4 $\pm$ 3.0  |
| Sediments of thermokarst lake in Tazovsky, continuous permafrost         | 27.3 $\pm$ 8.1  |
| Fluvisols in Taz River flood zone, south tundra, continuous permafrost   | 14.9 $\pm$ 2.2  |
| Cryic Histosols, frozen mound in Pangody, forest-tundra (CkP15)          | 50.0 $\pm$ 16.3 |
| Thermokarst lake sediment Pangody, August 2015                           | 27.7 $\pm$ 7.3  |
| Cryic Histosols, frozen mound in northern taiga Khanymey (X17-9)         | 43.6 $\pm$ 19.6 |
| Cryic Histosols, frozen mound in northern taiga Khanymey (X14-4)         | 57.1 $\pm$ 16.8 |
| Albic Alisol, light color soil, Khanymey, northern taiga Khanymey        | 13.0 $\pm$ 6.4  |
| Thermokarst lake sediment Khanymey, August 2015                          | 24.0 $\pm$ 3.0  |
| Histosols, bog, ridge, northern taiga, Kogalym , sporadic perm. (Kg16-1) | 65.4 $\pm$ 21.1 |
| Thermokarst lake sediment Kogalym, August 2015                           | 26.8 $\pm$ 2.5  |
| Histosols, bog, depression, middle taiga (Stepanova et al., 2015)        | 36.3 $\pm$ 18.8 |
| Histosols, bog, ridge, middle taiga (Stepanova et al., 2015)             | 79.4 $\pm$ 25.5 |
| Fluvisols in floodzone of the Ob River, southern taiga, Kaibasovo, 2017  | 11.0 $\pm$ 1.4  |

961

962

963

964

965

966

967

968

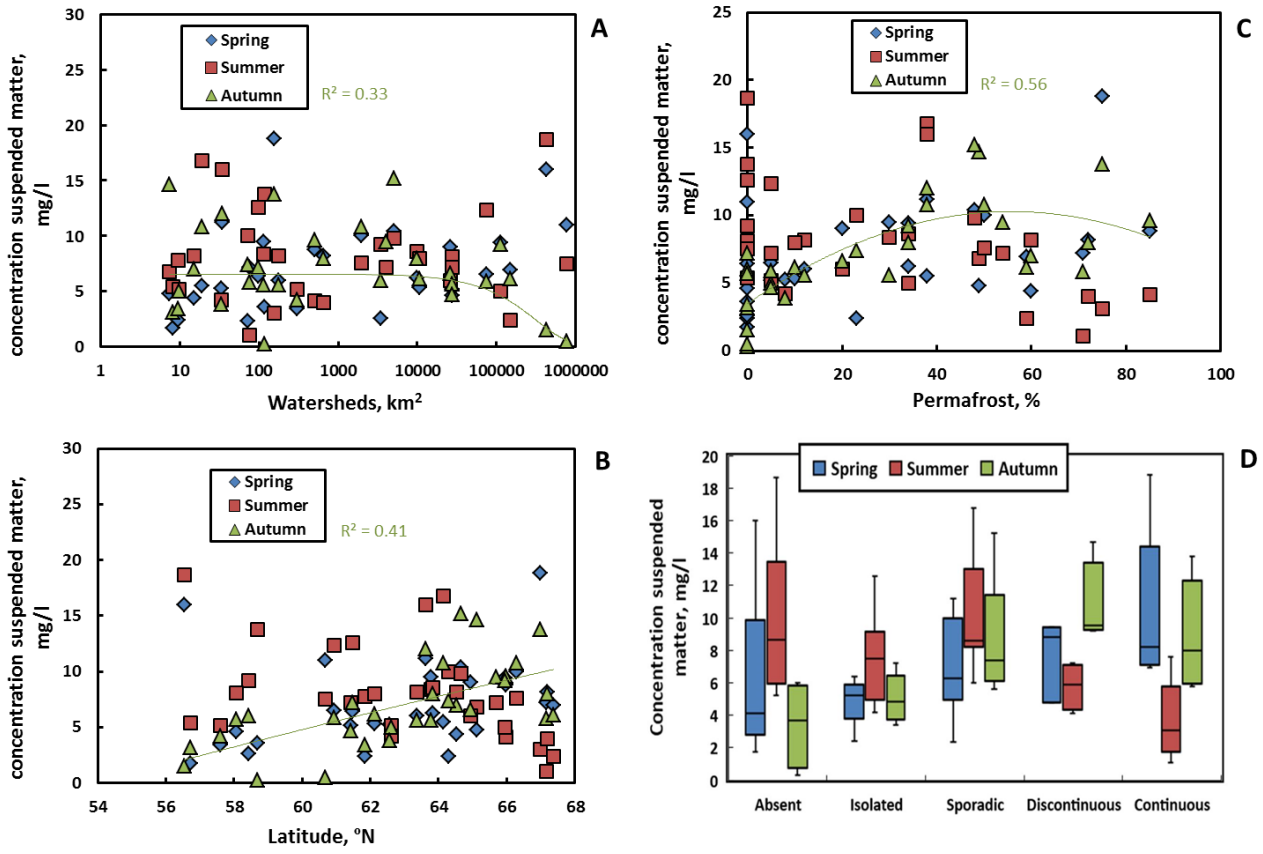

969  
 970  
 971  
 972  
 973  
 974

**Fig. S1.** Effect of watershed size (A), latitude (B), permafrost coverage (C) and box-plot of permafrost type (D) on RSM concentration in WSL rivers.

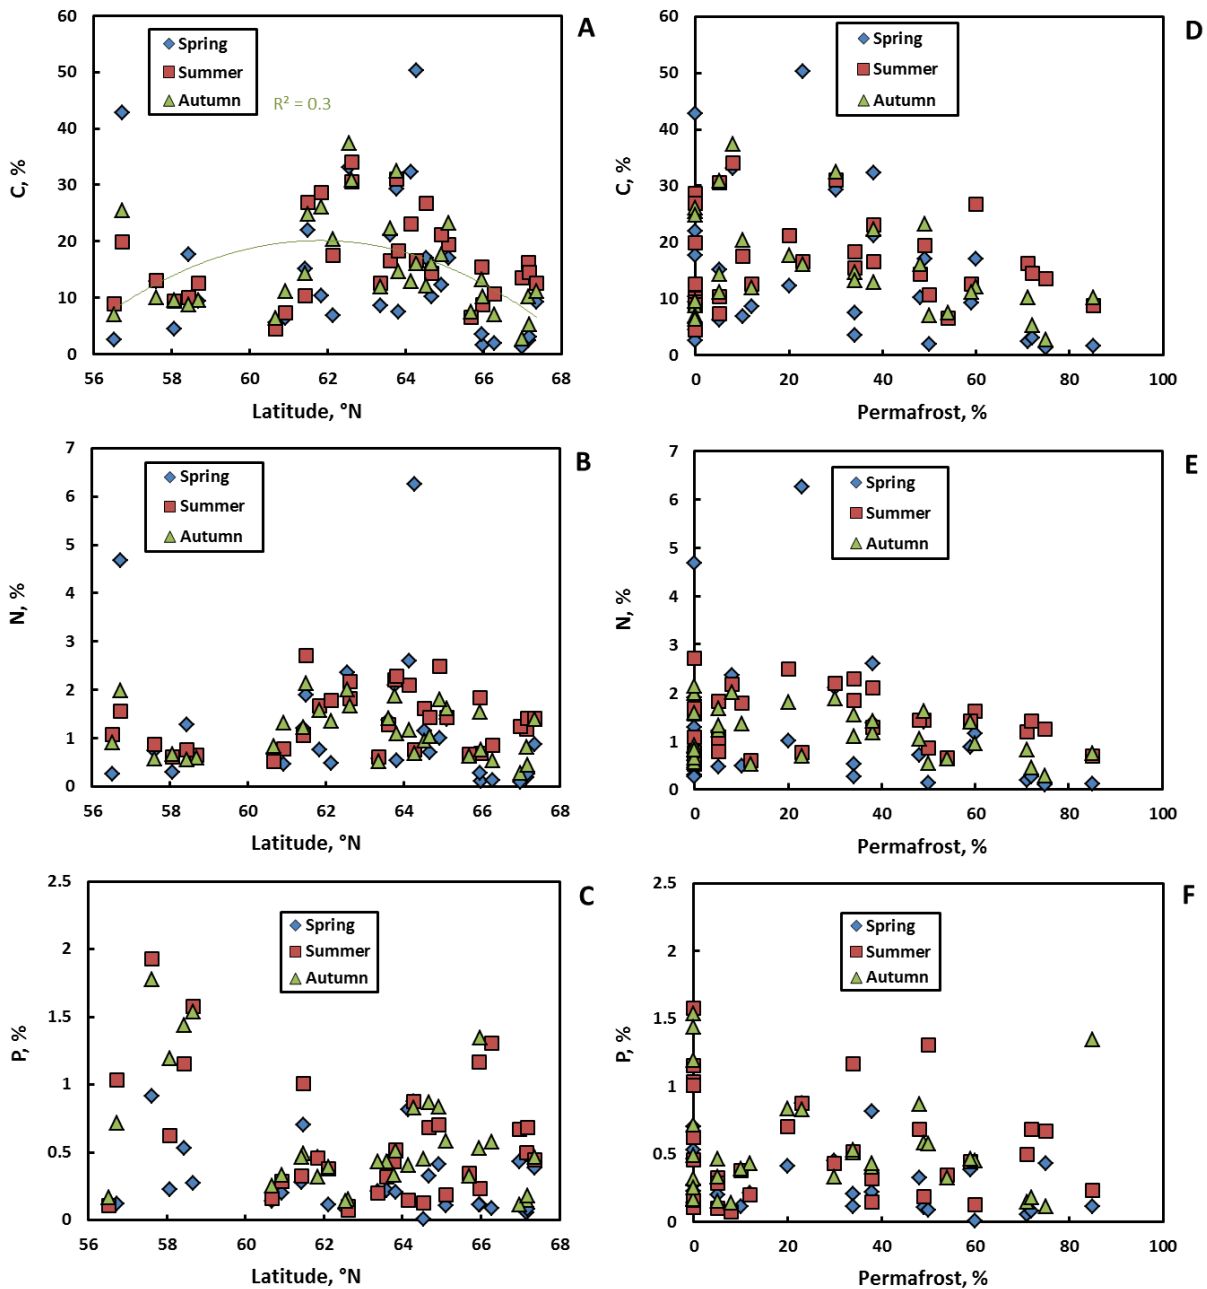

975

976

977 **Fig. S2.** Latitudinal dependences of C (A), N (B) and P (C) concentrations in RSM. A maximum  
 978 in C concentrations is observed at 62-64°N, of the isolated to sporadic permafrost zone, where  
 979 the maximal thawing of permafrost occurs (A). C (D), N (E) and P (F) concentration in RMS of  
 980 WSL rivers as a function of permafrost coverage of the watershed. There is a general decrease of  
 981 C and N concentration with an increase in permafrost coverage, consistent with maximal  
 982 nutrient concentration at the beginning of permafrost appearance.

983

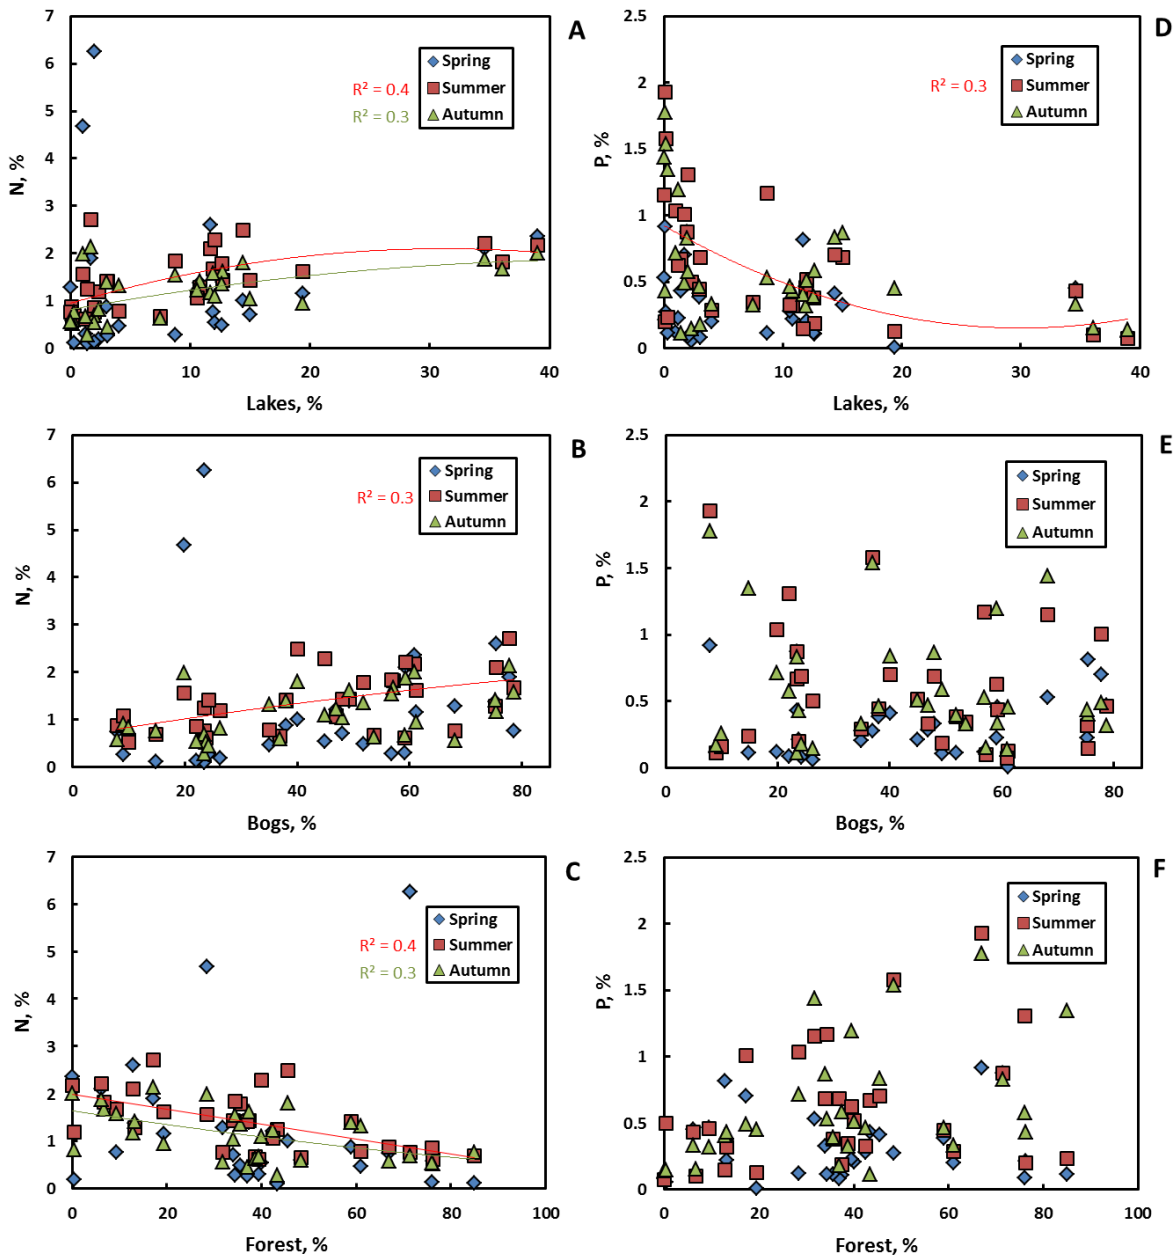

984

985

986 **Fig. S3.** N (A-C) and P (D-F) concentration in RSM (mass %) of WSL rivers as a function of  
 987 lakes (A, D), bogs (B, E) and forest (C, F) coverage of the watershed during different seasons.

988

989

990

991

992

993

994

995

996

997

998

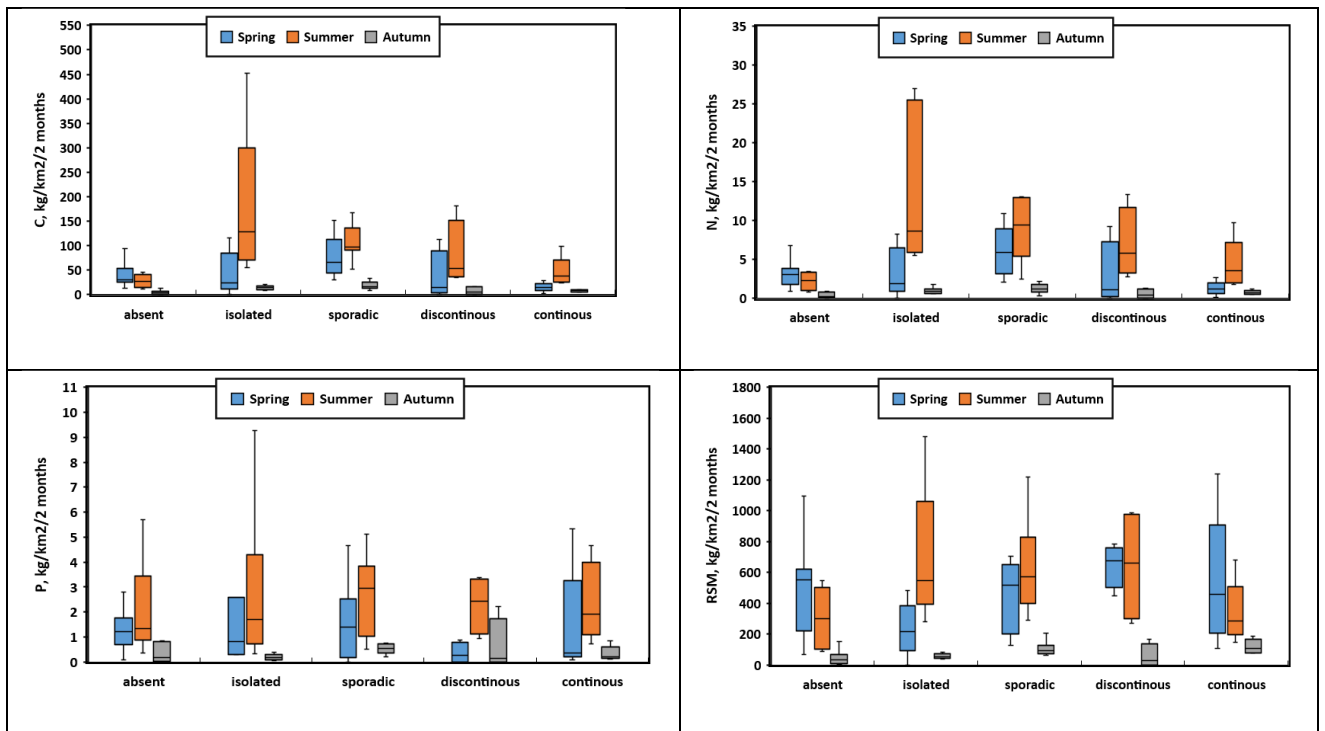

999

1000 **Fig. S4.** Seasonally-resolved export fluxes of particulate C, N, P and RSM from WSL rivers  
1001 during spring (May and June), summer (July and August) and autumn (September and  
1002 October) for permafrost-free region and 4 distinct permafrost zones.

1003

1004

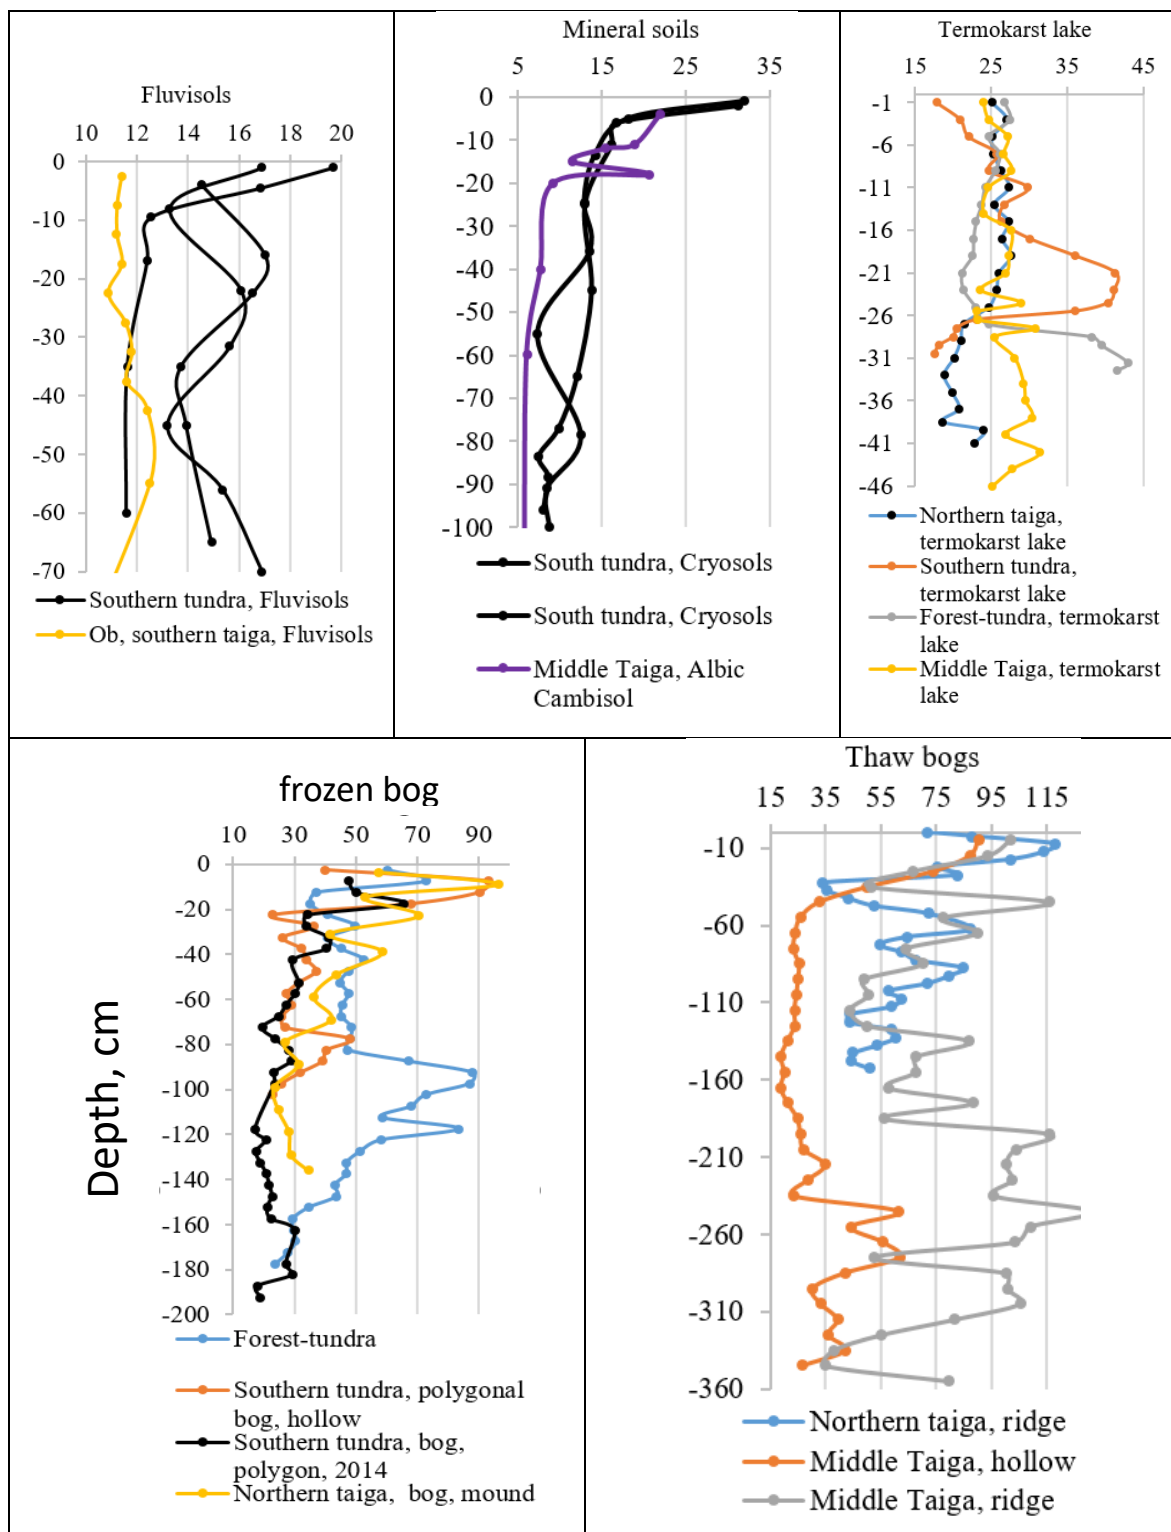

1005

1006

1007 **Fig. S5.** C:N in peat profile across the latitudinal transect of WSL, corresponding to four main  
 1008 regions (permafrost-free region of Ob, southern taiga; isolated/sporadic permafrost at Kogalym;  
 1009 discontinuous permafrost at Khanymey and continuous permafros at Tazovsky). Authors'  
 1010 unpublished data.
